# Supplementary material
Source: PubMed Central journal article supplement (PMC3637748)
Supplement: 1221012110_sd01.pdf [file 1221012110_sd01.pdf]

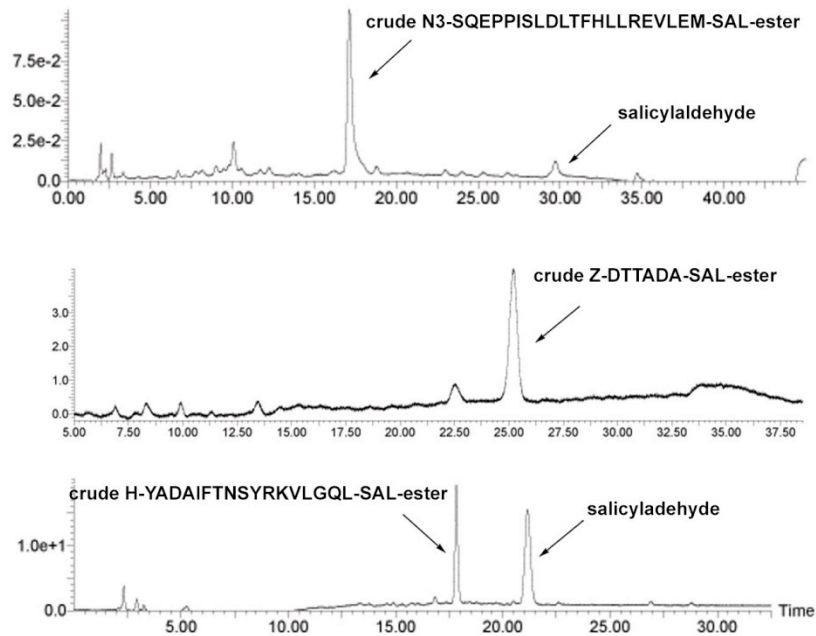

**Spectrum 1.** Representative analytical HPLC traces of the crude reaction mixtures revealing the formation of the peptide SAL-ester: gradient 5-50% CH<sub>3</sub>CN/H<sub>2</sub>O over 20 min followed by 50% isocratic CH<sub>3</sub>CN/H<sub>2</sub>O over another 10 min at a flow rate of 0.6 mL/min.

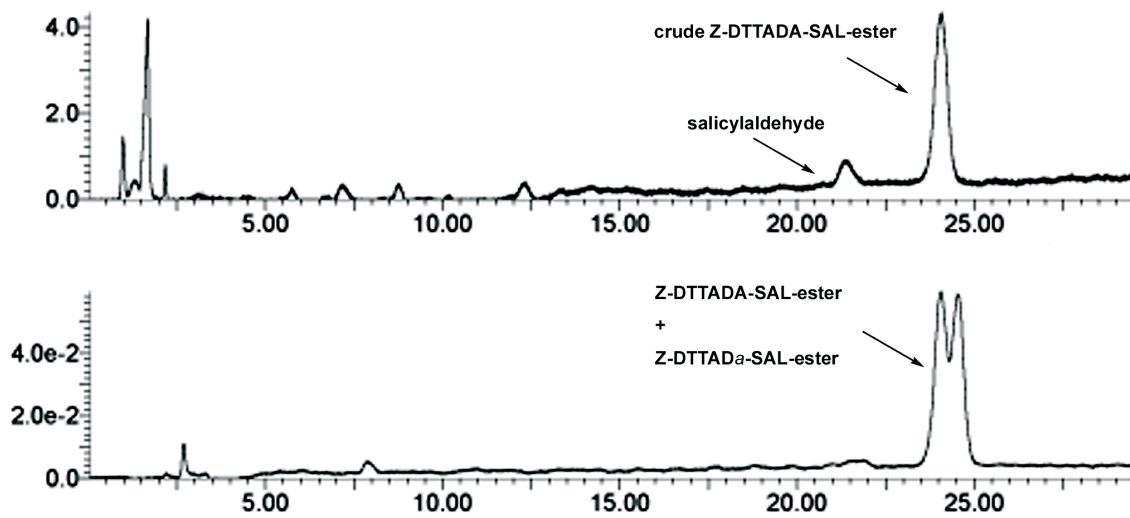

**Spectrum 2.** UV traces from LC-MS analysis of the epimerization study: gradient 25-35% CH<sub>3</sub>CN/H<sub>2</sub>O over 30 min at a flow rate of 0.6 mL/min. (top) HPLC trace of the preparation of Z-DTTADA SAL-ester from the crude reaction mixture; (bottom) HPLC trace of the co-injected Z-DTTADA SAL-ester and Z-DTTADa SAL-ester.

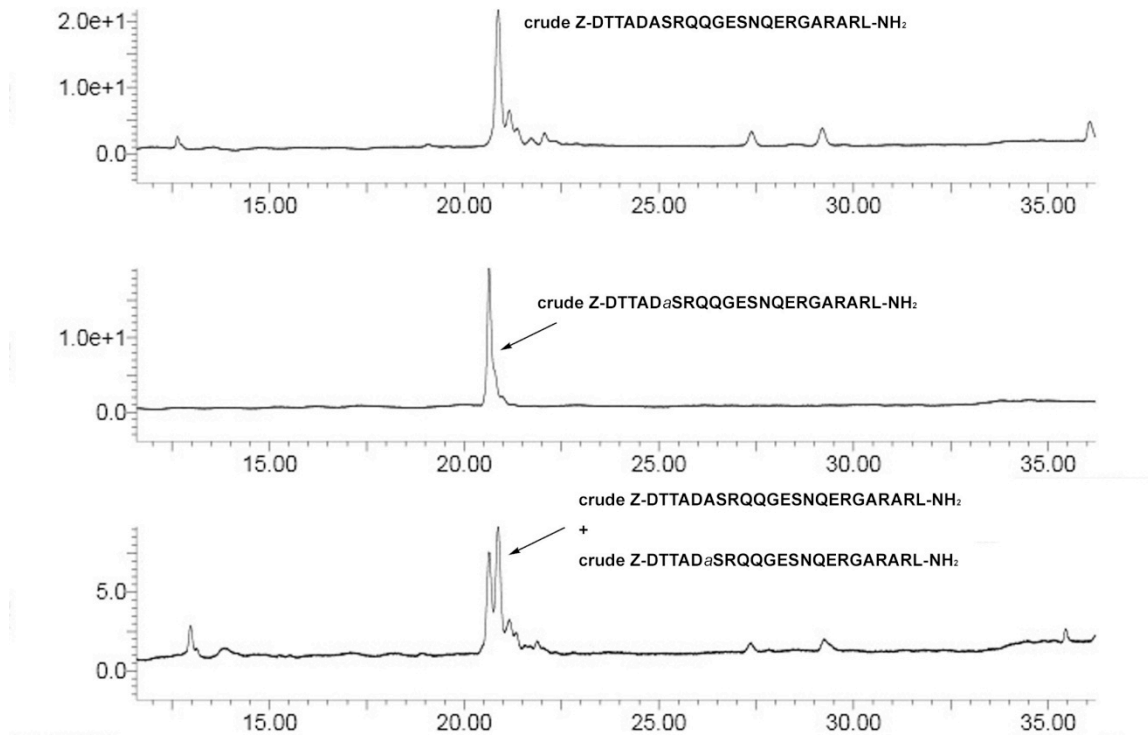

**Spectrum 3.** UV traces from LC-MS analysis of the epimerization study during ligation: gradient 5-30% CH<sub>3</sub>CN/H<sub>2</sub>O over 30 min at a flow rate of 0.6 mL/min.

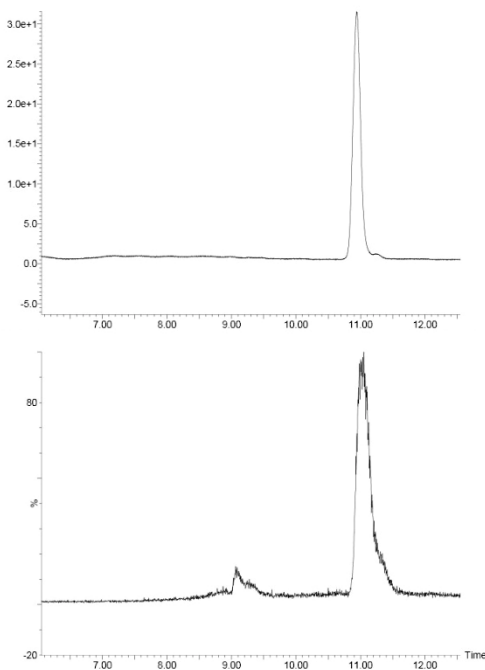

**Spectrum 4.** UV and MS traces from LC-MS analysis of compound 1: gradient 5-95% CH<sub>3</sub>CN/H<sub>2</sub>O over 15 min at a flow rate of 0.6 mL/min.

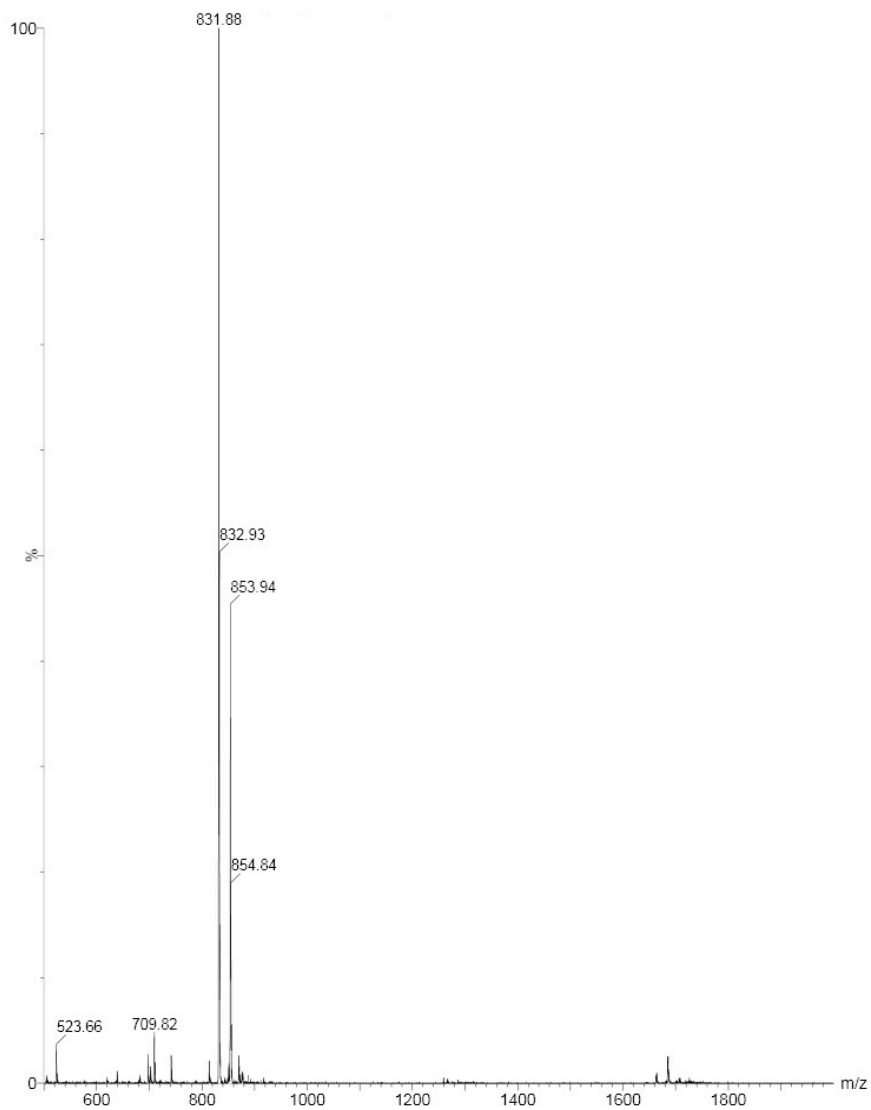

**Spectrum 5.** ESI calcd for  $C_{37}H_{46}N_6O_{16}$   $[M+H]^+$   $m/z = 831.79$ , found: 831.88.

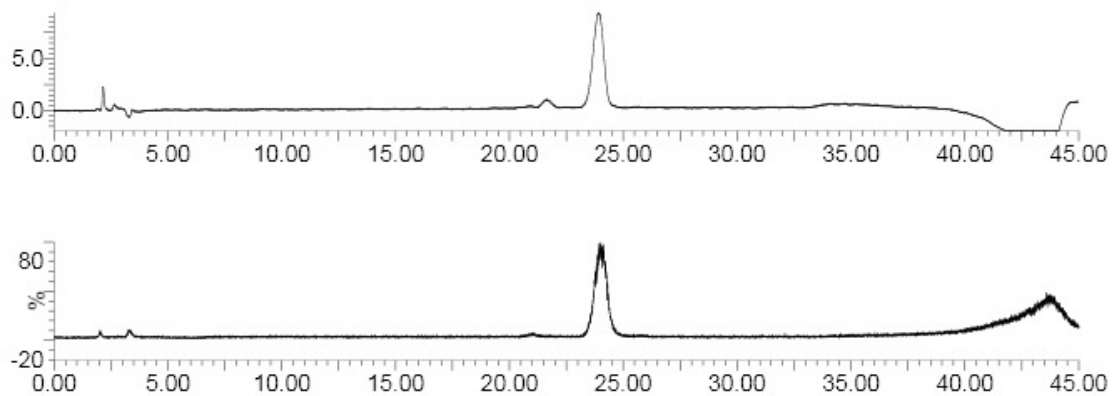

**Spectrum 6.** UV and MS traces from LC-MS analysis of compound **2**: gradient 25-35% CH<sub>3</sub>CN/H<sub>2</sub>O over 30 min at a flow rate of 0.6 mL/min.

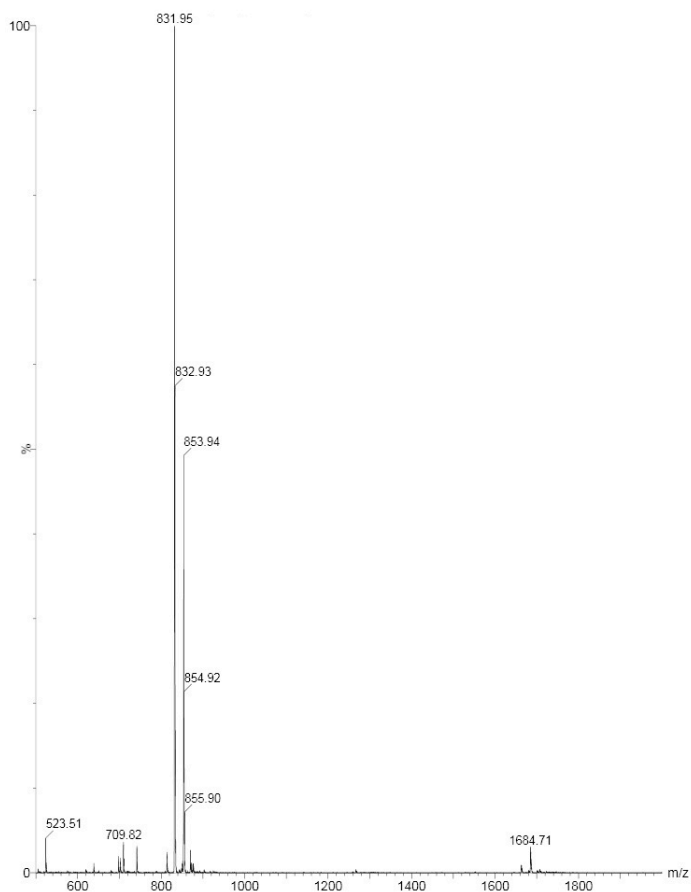

**Spectrum 7.** ESI calcd for C<sub>37</sub>H<sub>46</sub>N<sub>6</sub>O<sub>16</sub> [M+H]<sup>+</sup>  $m/z = 831.79$ , found: 831.95.

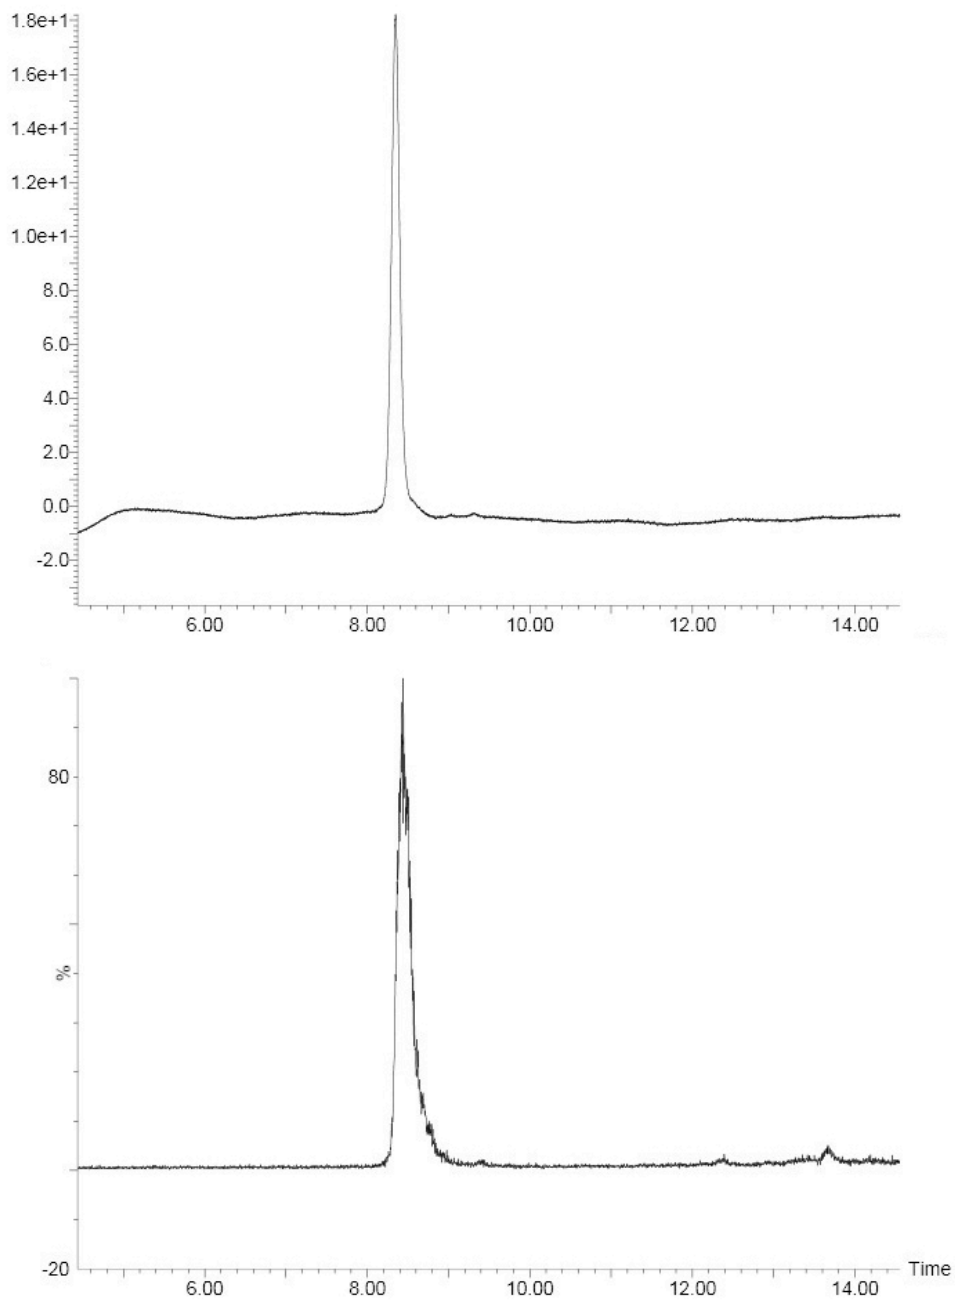

**Spectrum 8.** UV and MS traces from LC-MS analysis of compound **3**: gradient 5-50% CH<sub>3</sub>CN/H<sub>2</sub>O over 20 min followed by 50% isocratic CH<sub>3</sub>CN/H<sub>2</sub>O over another 10 min at a flow rate of 0.6 mL/min.

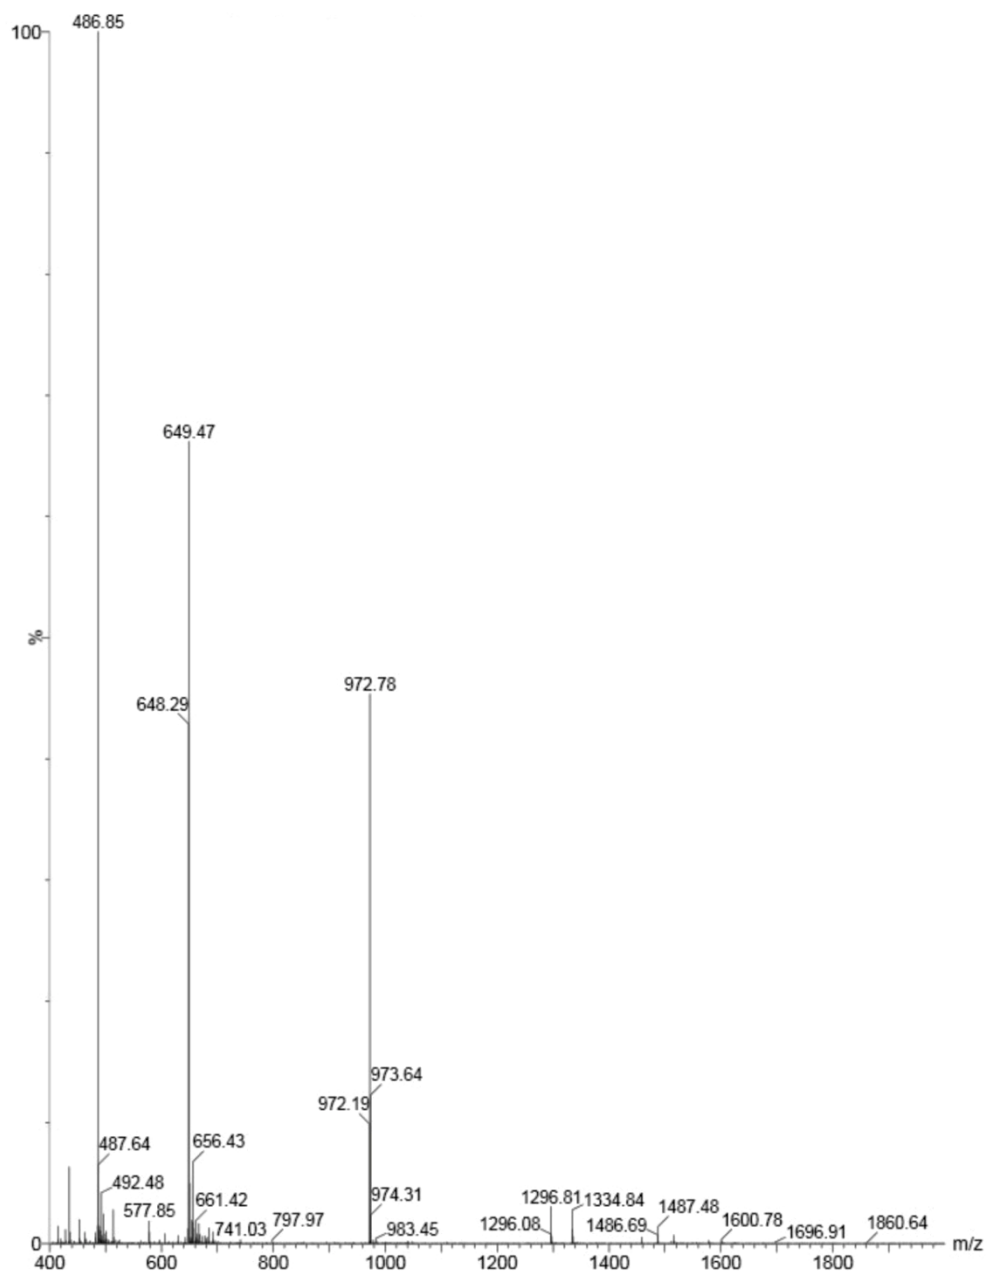

**Spectrum 9.** ESI calcd for  $C_{75}H_{132}N_{34}O_{27}$   $[M+H]^+$   $m/z = 1943.06$   $[M+2H]^{2+}$   $m/z = 972.03$   $[M+3H]^{3+}$   $m/z = 648.35$   $[M+4H]^{4+}$   $m/z = 486.52$ , found: 972.78, 649.47, 486.85.

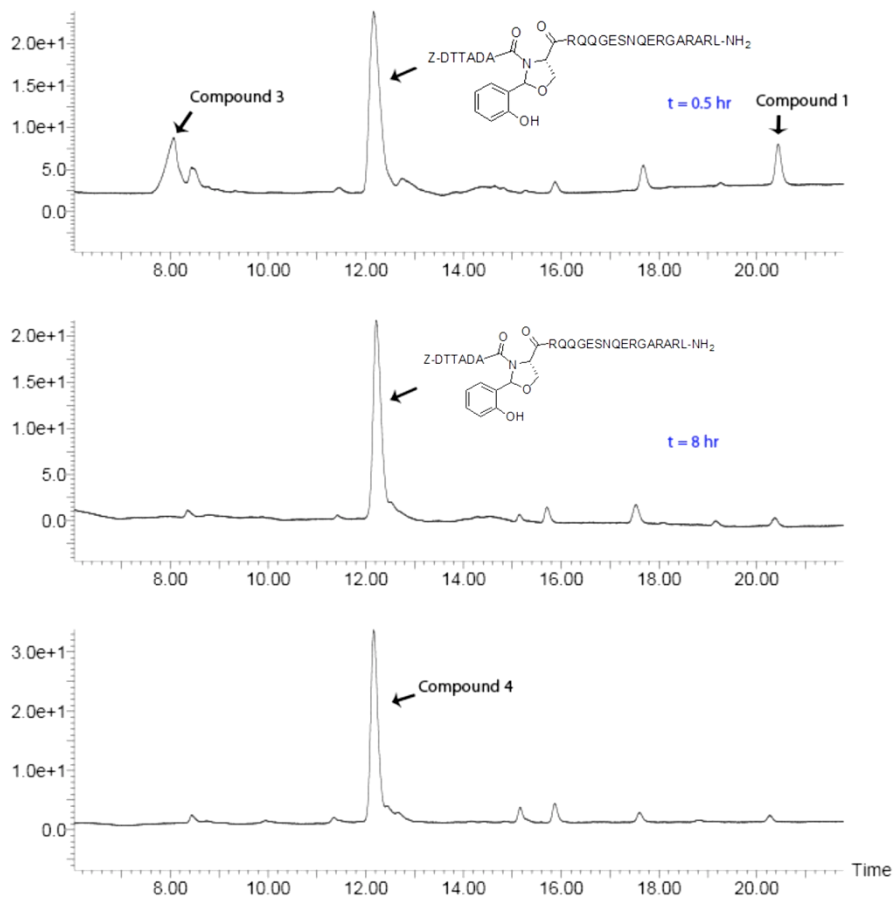

**Spectrum 10.** UV traces from LC-MS analysis of **serine ligation**: gradient 5-50% CH<sub>3</sub>CN/H<sub>2</sub>O over 20 min and 50-50% CH<sub>3</sub>CN/H<sub>2</sub>O over another 10 min at a flow rate of 0.6 mL/min.

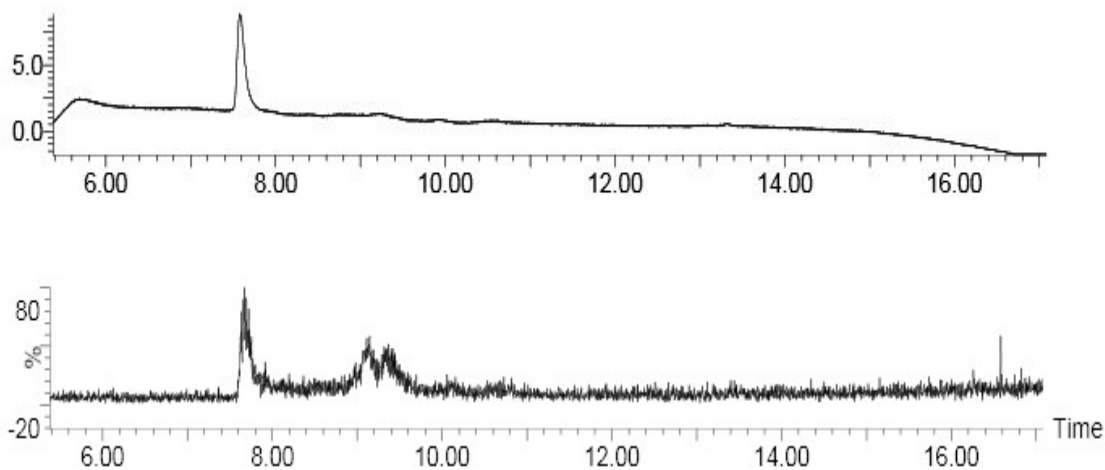

**Spectrum 11.** UV and MS traces from LC-MS analysis of purified **compound 4**: gradient 5-95% CH<sub>3</sub>CN/H<sub>2</sub>O over 15 min at a flow rate of 0.6 mL/min.

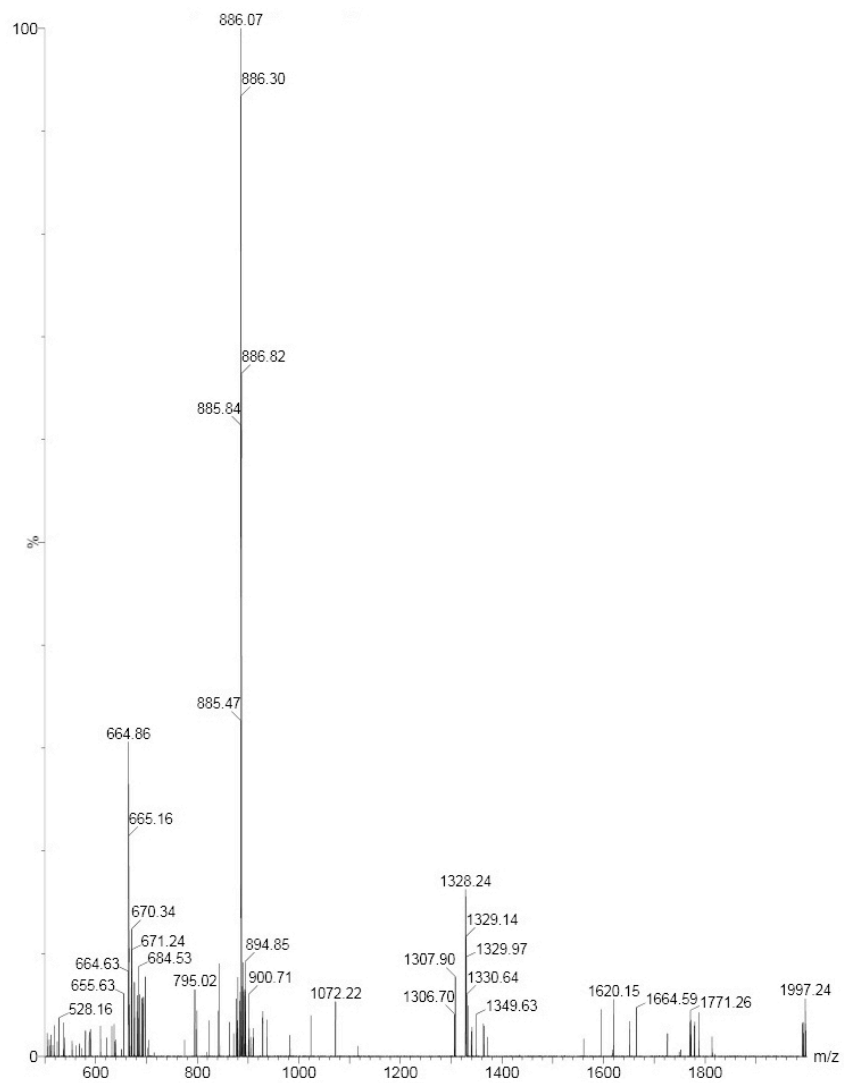

**Spectrum 12.** ESI calcd for  $C_{105}H_{172}N_{40}O_{41}$   $[M+H]^+$   $m/z = 2651.73$   $[M+2H]^{2+}$   $m/z = 1326.37$   $[M+3H]^{3+}$   $m/z = 884.58$   $[M+4H]^{4+}$   $m/z = 663.68$ , found: 1328.24, 886.07, 664.86.



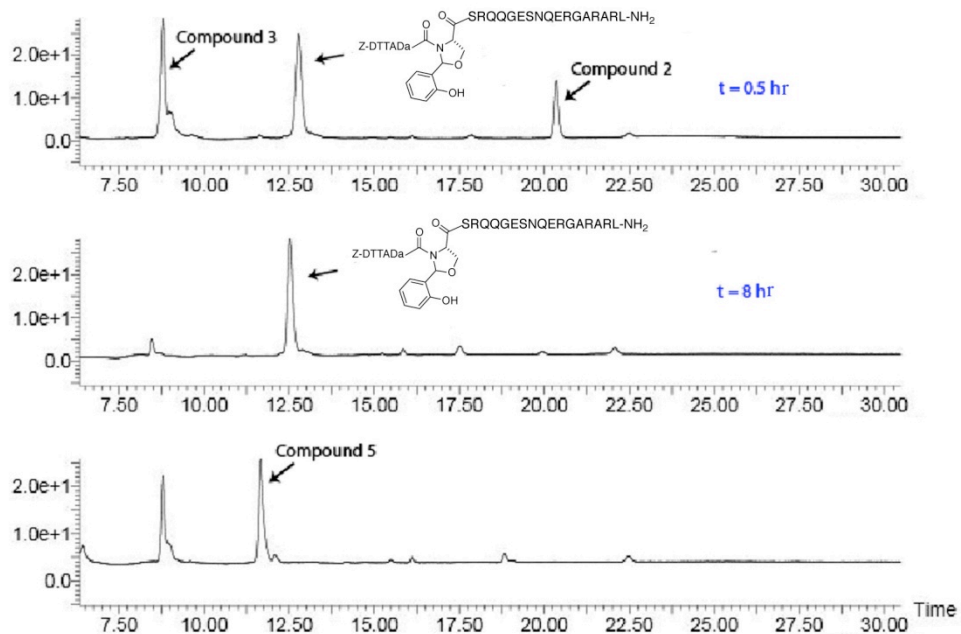

**Spectrum 13.** UV traces from LC-MS analysis of **serine ligation**: gradient 5-50% CH<sub>3</sub>CN/H<sub>2</sub>O over 20 min followed by 50% isocratic CH<sub>3</sub>CN/H<sub>2</sub>O over another 10 min at a flow rate of 0.6 mL/min.

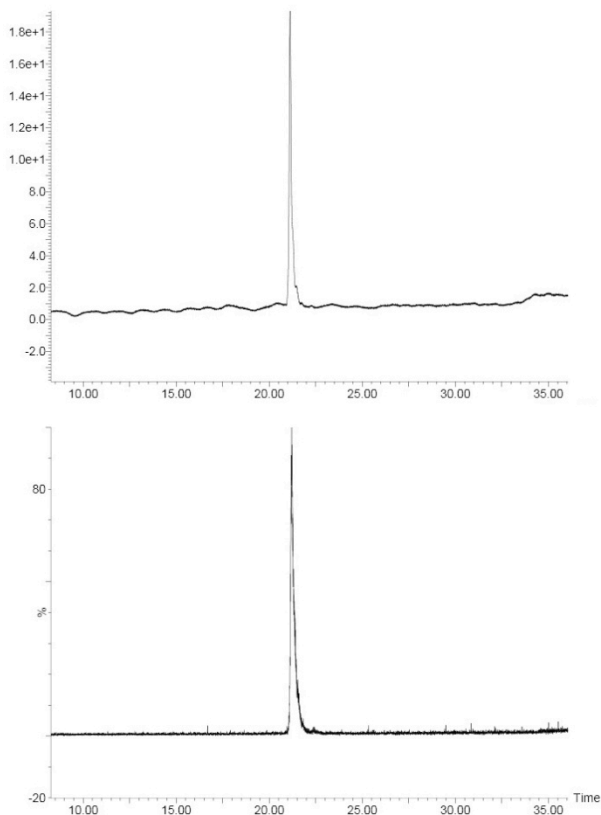

**Spectrum 14.** UV and MS traces from LC-MS analysis of purified compound **5**: gradient 5-30% CH<sub>3</sub>CN/H<sub>2</sub>O over 30 min at a flow rate of 0.6 mL/min.

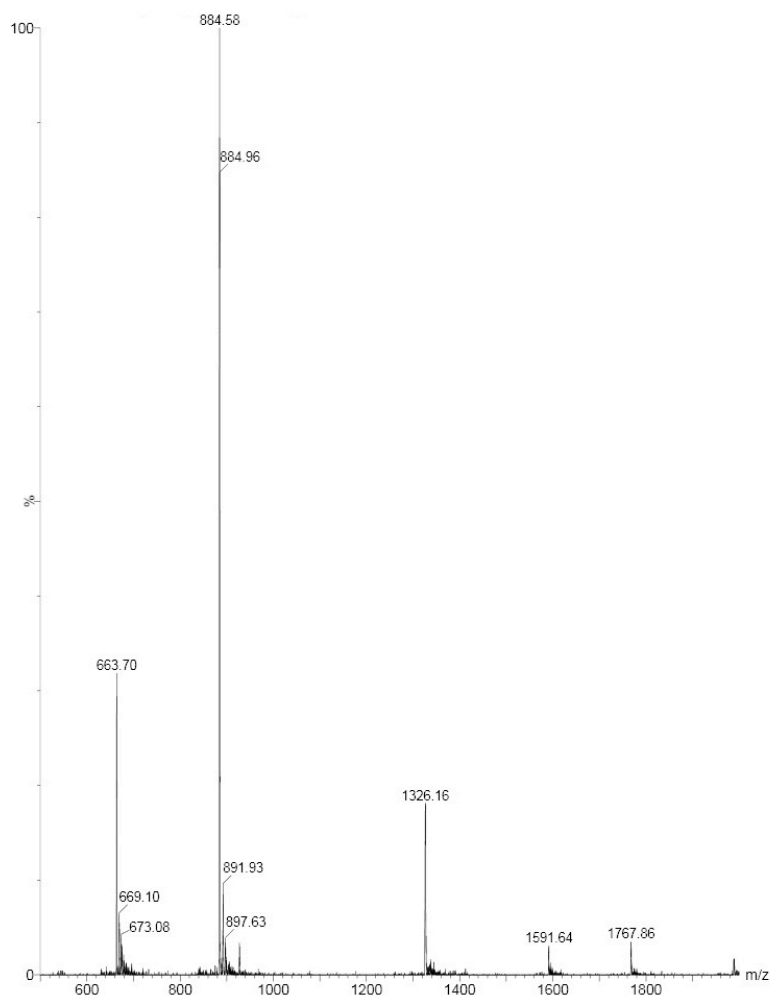

**Spectrum 15.** ESI calcd for  $C_{105}H_{172}N_{40}O_{41}$   $[M+H]^+$   $m/z = 2651.73$   $[M+2H]^{2+}$   $m/z = 1326.37$   $[M+3H]^{3+}$   $m/z = 884.58$   $[M+4H]^{4+}$   $m/z = 663.68$ , found: 1326.16, 884.58, 663.70.

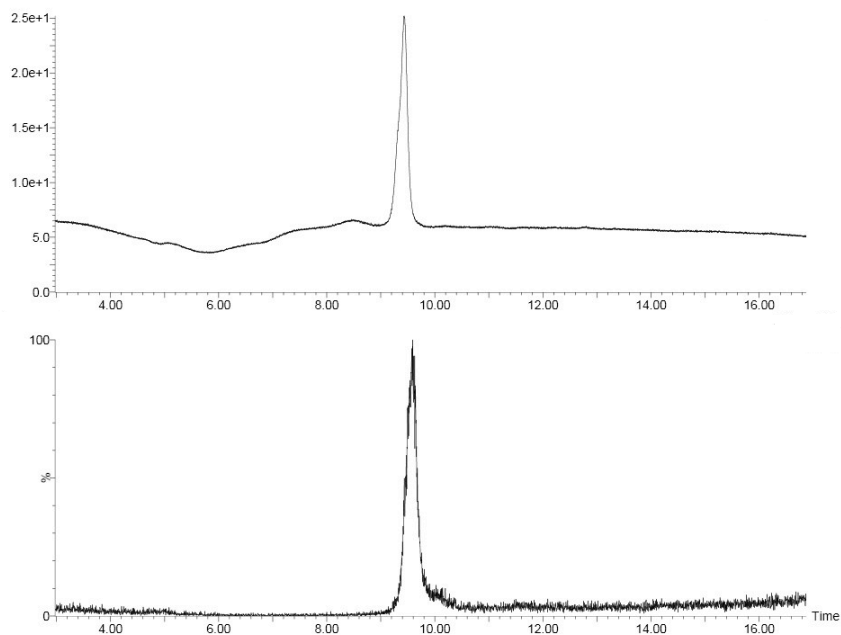

**Spectrum 16.** UV and MS traces from LC-MS analysis of purified compound **6**: gradient 5-95% CH<sub>3</sub>CN/H<sub>2</sub>O over 15 min at a flow rate of 0.6 mL/min.

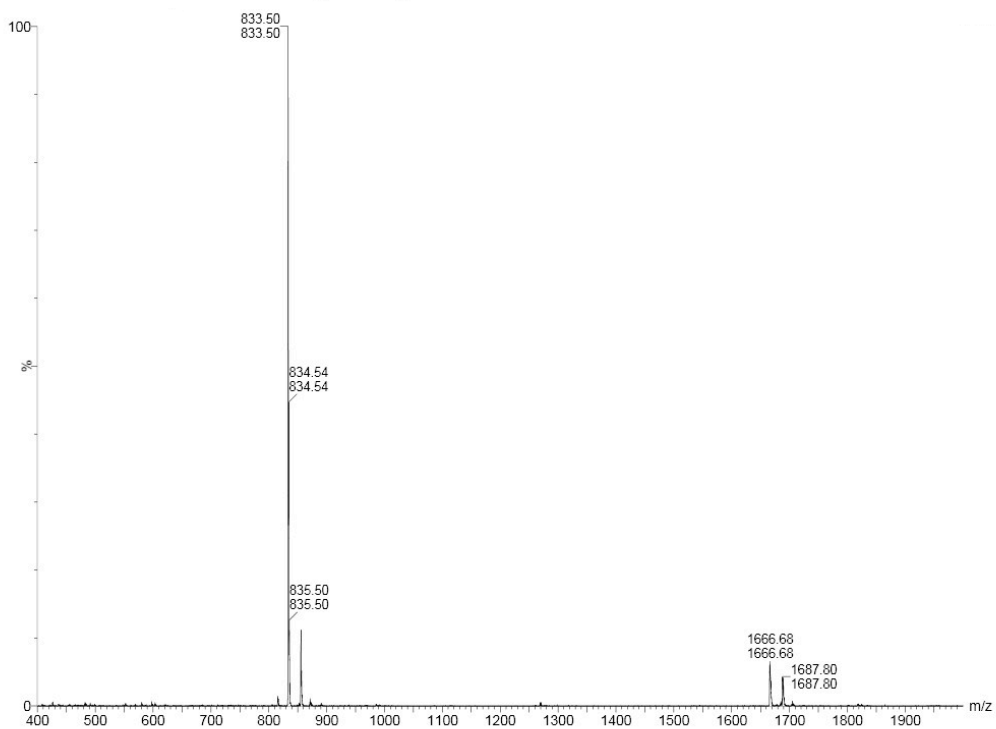

**Spectrum 17.** ESI calcd for C<sub>37</sub>H<sub>56</sub>N<sub>10</sub>O<sub>12</sub> [M+H]<sup>+</sup>  $m/z$  = 833.90, found: 833.50.

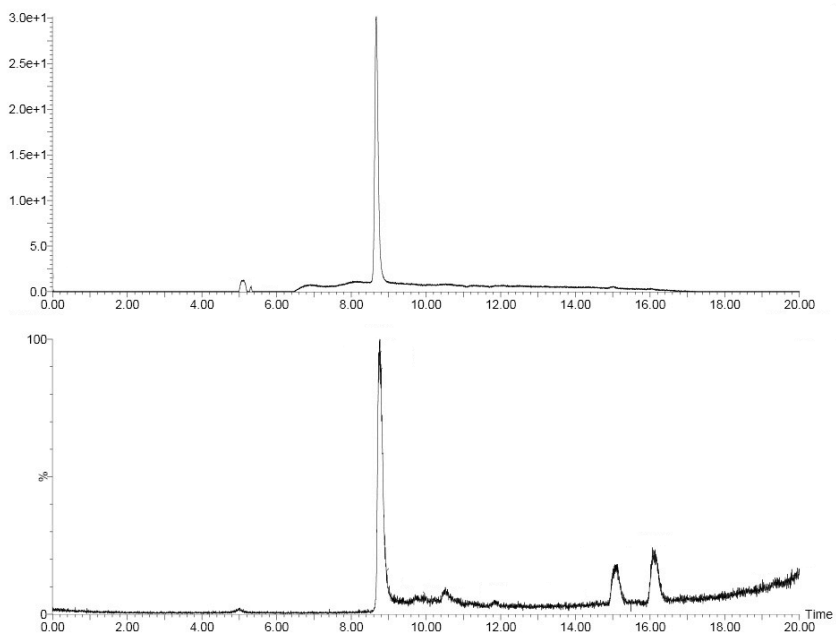

**Spectrum 18.** UV and MS traces from LC-MS analysis of purified compound **7**: gradient 5-95% CH<sub>3</sub>CN/H<sub>2</sub>O over 15 min at a flow rate of 0.6 mL/min.

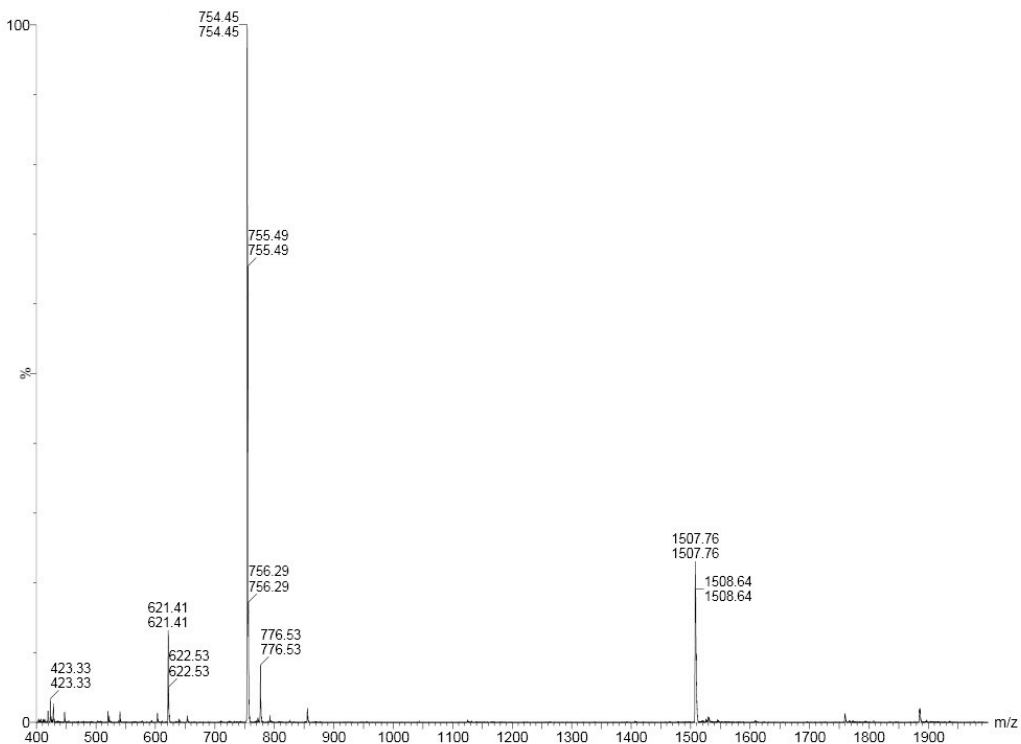

**Spectrum 19.** ESI calcd for C<sub>32</sub>H<sub>51</sub>N<sub>9</sub>O<sub>12</sub> [M+H]<sup>+</sup> m/z = 754.80, found: 754.45.

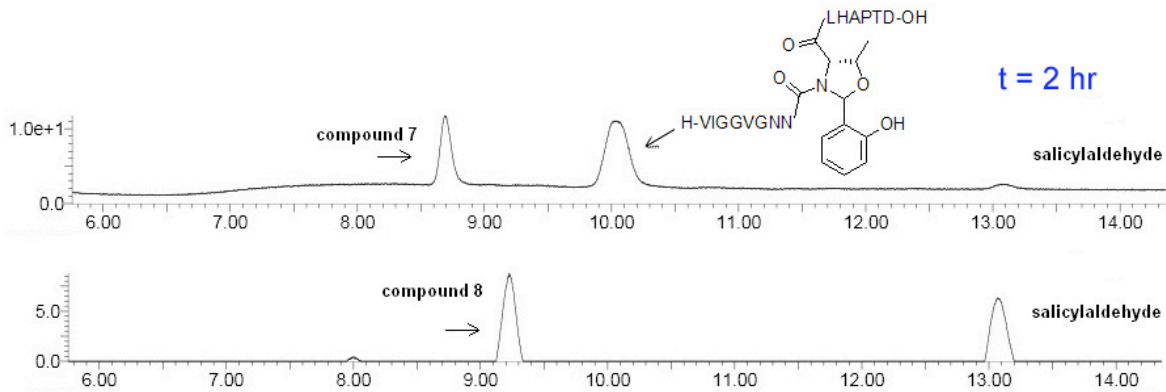

**Spectrum 20.** UV traces from LC-MS analysis of **threonine ligation**: gradient 5-95% CH<sub>3</sub>CN/H<sub>2</sub>O over 15min at a flow rate of 0.6 mL/min.

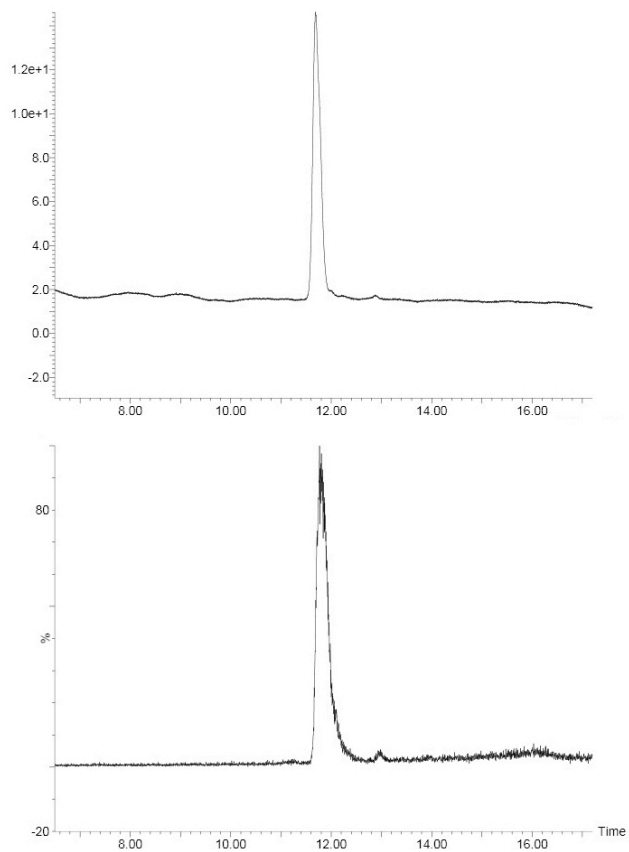

**Spectrum 21.** UV and MS traces from LC-MS analysis of purified **compound 9**: gradient 5-50% CH<sub>3</sub>CN/H<sub>2</sub>O over 20 min and 50-50% CH<sub>3</sub>CN/H<sub>2</sub>O over another 10 min at a flow rate of 0.6 mL/min.

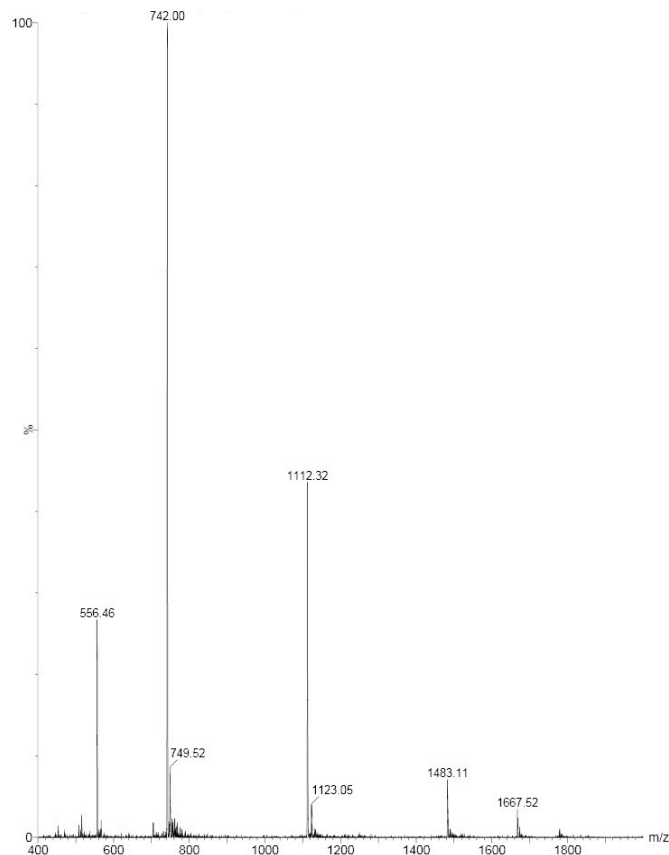

**Spectrum 22.** ESI calcd for  $C_{94}H_{161}N_{31}O_{31}$   $[M+H]^+$   $m/z = 2222.47$   $[M+2H]^{2+}$   $m/z = 1111.74$   $[M+3H]^{3+}$   $m/z = 741.49$   $[M+4H]^{4+}$   $m/z = 556.37$ , found: 1112.32, 742.00, 556.46.

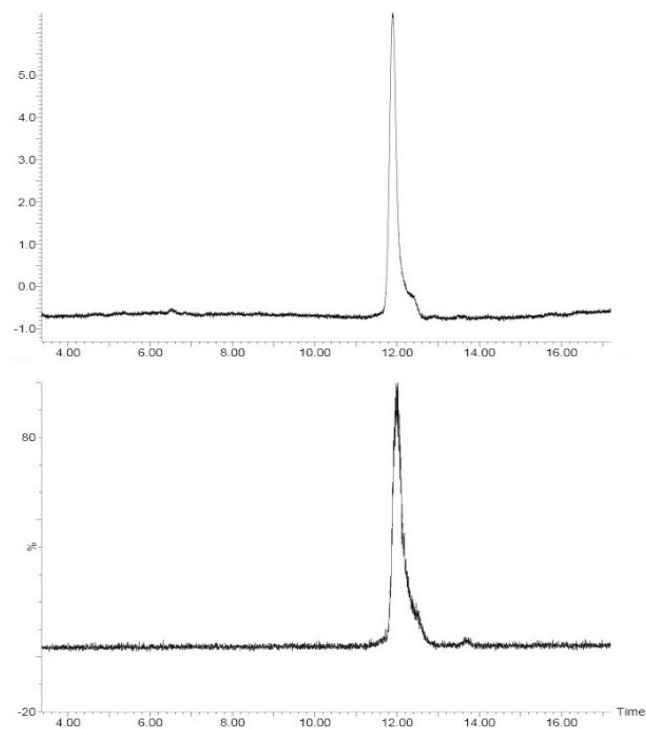

**Spectrum 23.** UV and MS traces from LC-MS analysis of purified compound **10**: gradient 40-60% CH<sub>3</sub>CN/H<sub>2</sub>O over 15 min at a flow rate of 0.6 mL/min.

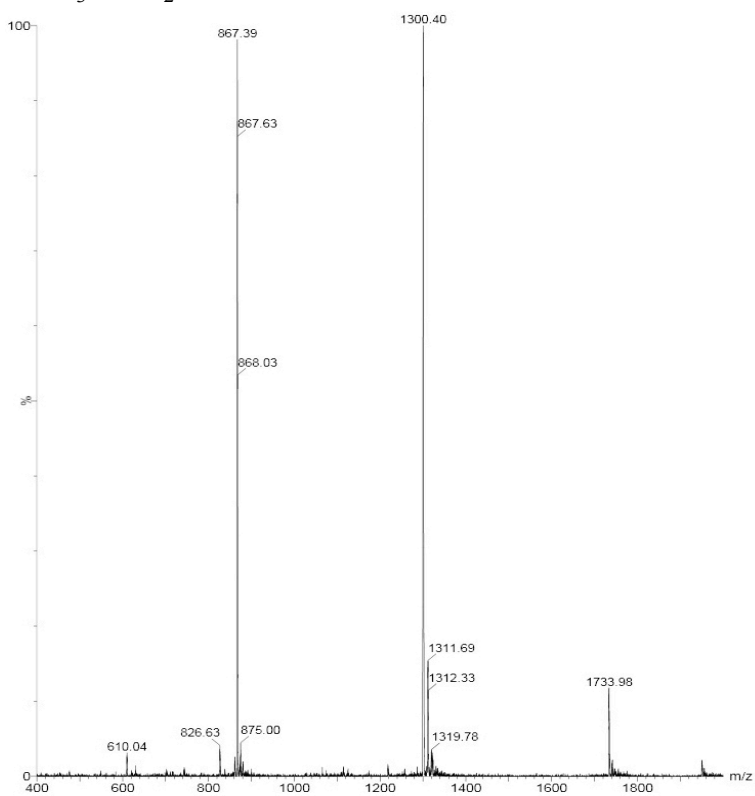

**Spectrum 24.** ESI calcd for C<sub>118</sub>H<sub>181</sub>N<sub>29</sub>O<sub>35</sub>S [M+H]<sup>+</sup>  $m/z = 2598.94$  [M+2H]<sup>2+</sup>  $m/z = 1299.97$  [M+3H]<sup>3+</sup>  $m/z = 866.98$ , found: 1300.40, 867.39.

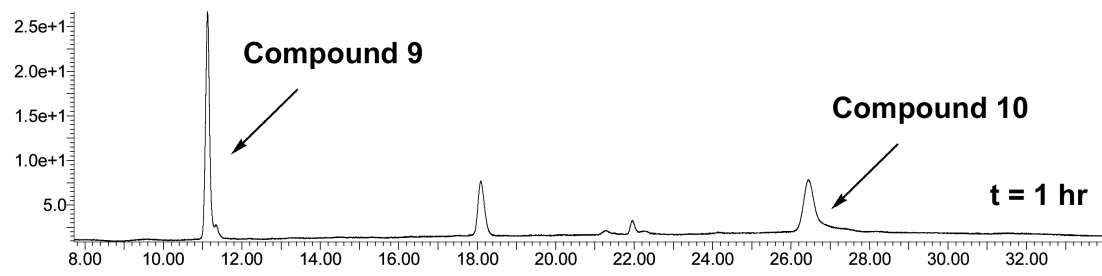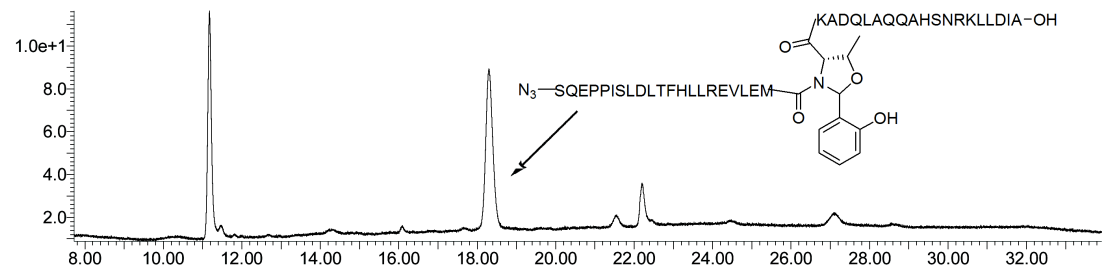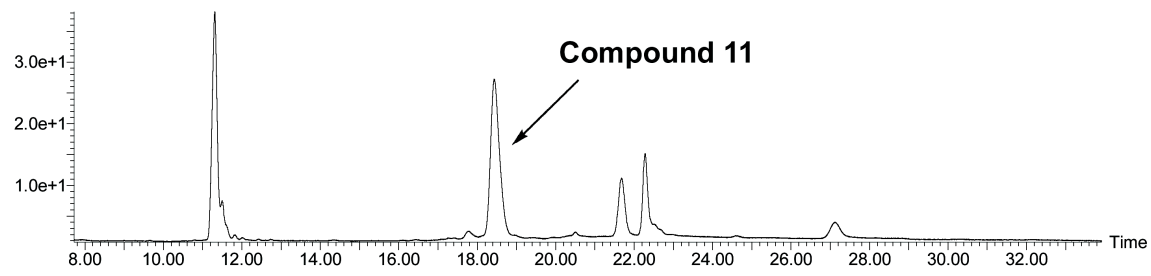

**Spectrum 25.** UV traces from LC-MS analysis of **threonine ligation**: gradient 5-50% CH<sub>3</sub>CN/H<sub>2</sub>O over 20 min followed by 50% isocratic CH<sub>3</sub>CN/H<sub>2</sub>O over another 10 min at a flow rate of 0.6 mL/min.



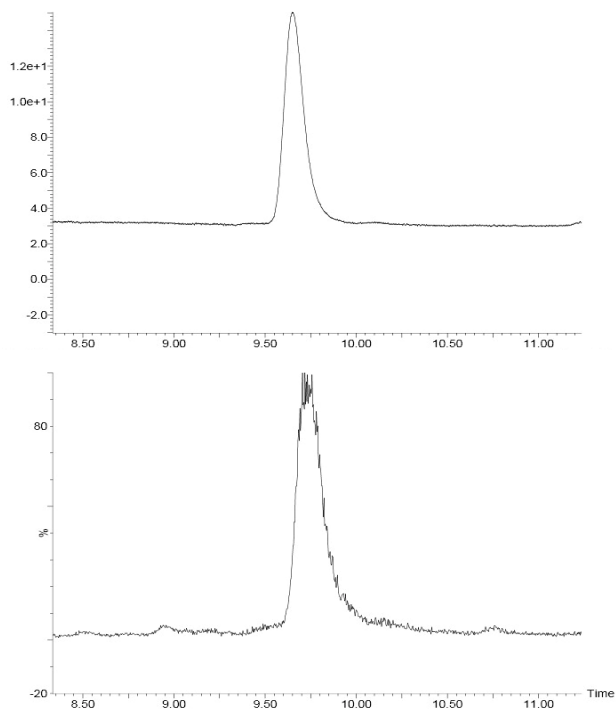

**Spectrum 26.** UV and MS traces from LC-MS analysis of purified compound **11**: gradient 5-95% CH<sub>3</sub>CN/H<sub>2</sub>O over 15 min at a flow rate of 0.6 mL/min.

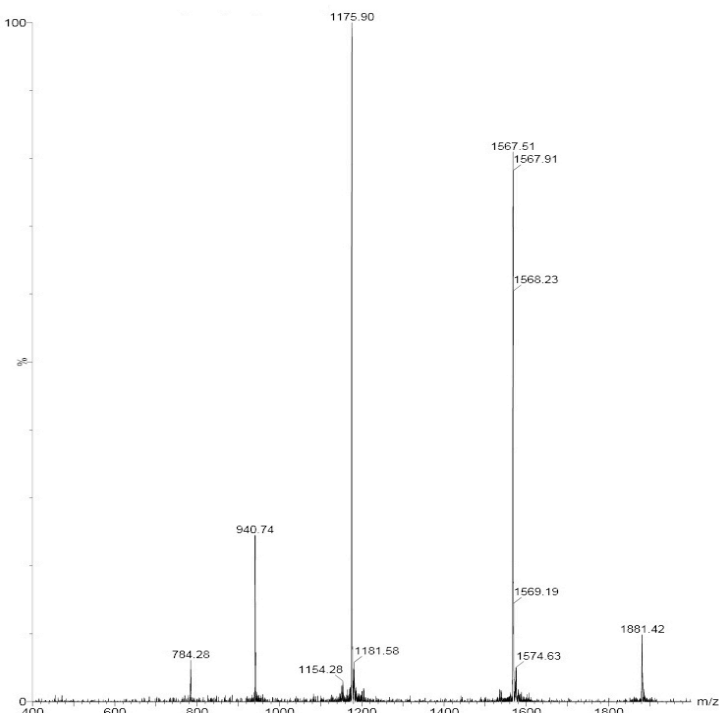

**Spectrum 27.** ESI calcd for C<sub>205</sub>H<sub>336</sub>N<sub>60</sub>O<sub>64</sub>S [M+H]<sup>+</sup>  $m/z = 4698.29$  [M+3H]<sup>3+</sup>  $m/z = 1566.76$  [M+4H]<sup>4+</sup>  $m/z = 1175.32$  [M+5H]<sup>5+</sup>  $m/z = 940.46$  [M+6H]<sup>6+</sup>  $m/z = 783.88$ , found: 1567.51, 1175.90, 940.74, 784.28.

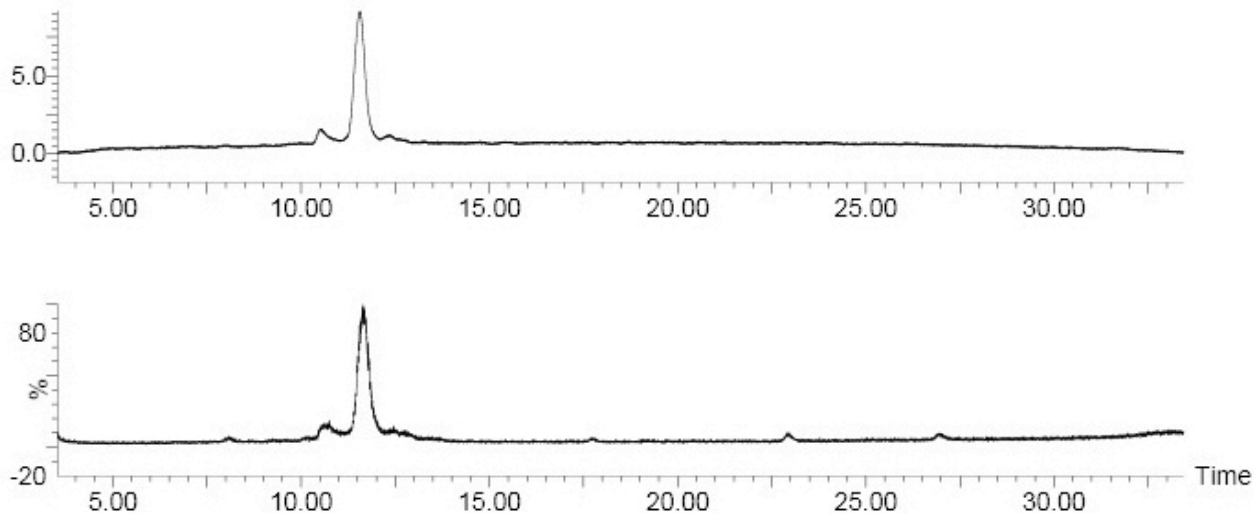

**Spectrum 28.** UV and MS traces from LC-MS analysis of crude compound **12**: gradient 25-70% CH<sub>3</sub>CN/H<sub>2</sub>O over 30 min at a flow rate of 0.6 mL/min.

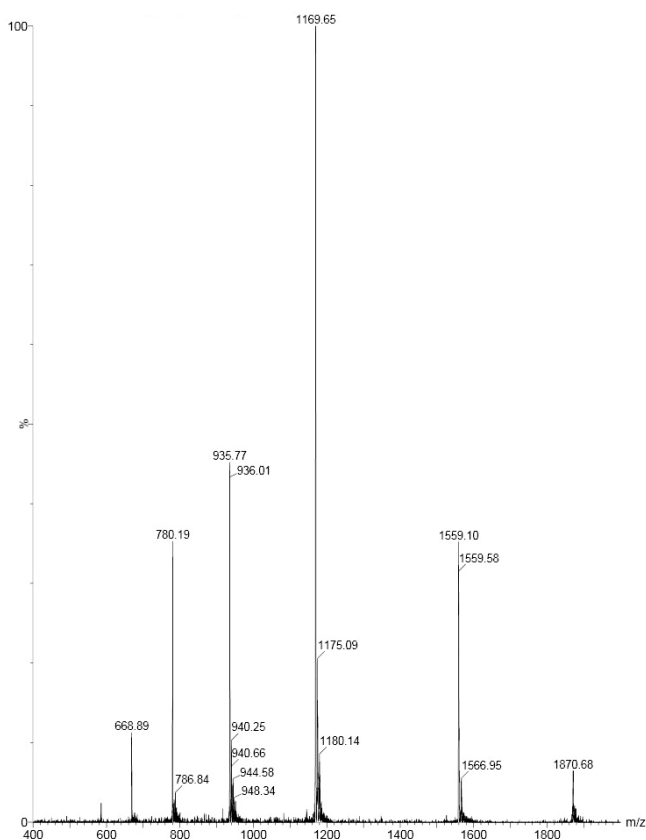

**Spectrum 29.** ESI calcd for C<sub>205</sub>H<sub>338</sub>N<sub>58</sub>O<sub>64</sub>S [M+H]<sup>+</sup>  $m/z = 4672.29$  [M+3H]<sup>3+</sup>  $m/z = 1558.10$  [M+4H]<sup>4+</sup>  $m/z = 1168.82$  [M+5H]<sup>5+</sup>  $m/z = 935.26$  [M+6H]<sup>6+</sup>  $m/z = 779.55$  [M+7H]<sup>7+</sup>  $m/z = 668.33$ , found: 1559.10, 1169.65, 935.77, 780.19, 668.89.

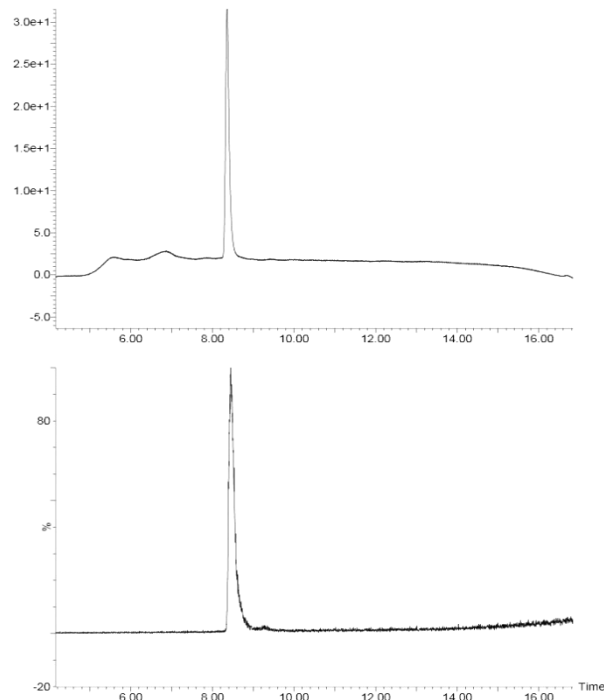

**Spectrum 30.** UV and MS traces from LC-MS analysis of purified compound **13**: gradient 5-95% CH<sub>3</sub>CN/H<sub>2</sub>O over 15 min at a flow rate of 0.6 mL/min.

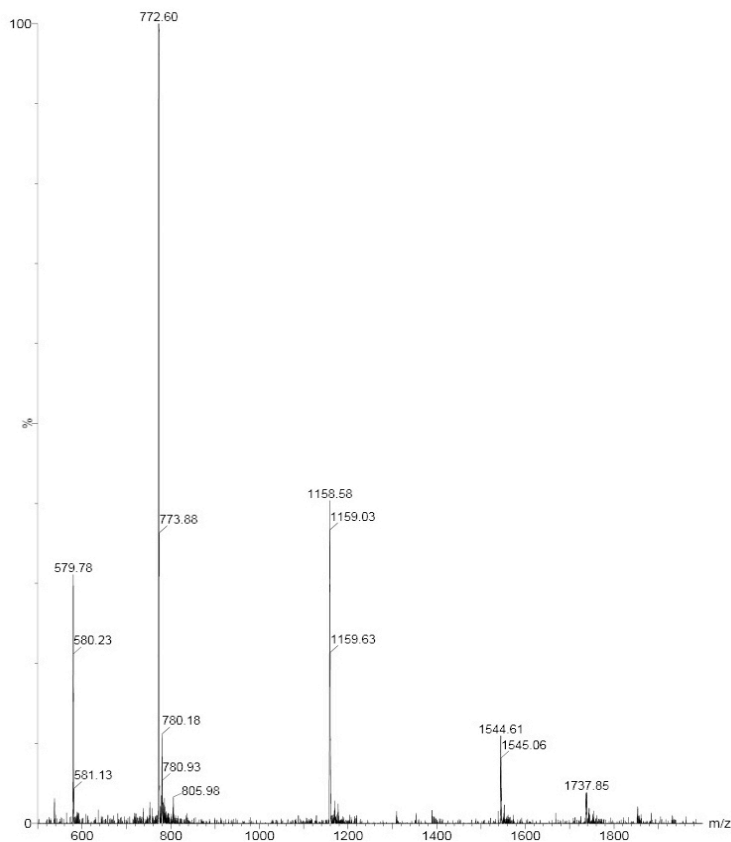

**Spectrum 31.** ESI calcd for C<sub>103</sub>H<sub>163</sub>N<sub>31</sub>O<sub>28</sub>S [M+H]<sup>+</sup>  $m/z = 2316.65$  [M+2H]<sup>2+</sup>  $m/z = 1158.83$  [M+3H]<sup>3+</sup>  $m/z = 772.88$  [M+4H]<sup>4+</sup>  $m/z = 579.91$ , found: 1158.58, 772.60, 579.78.

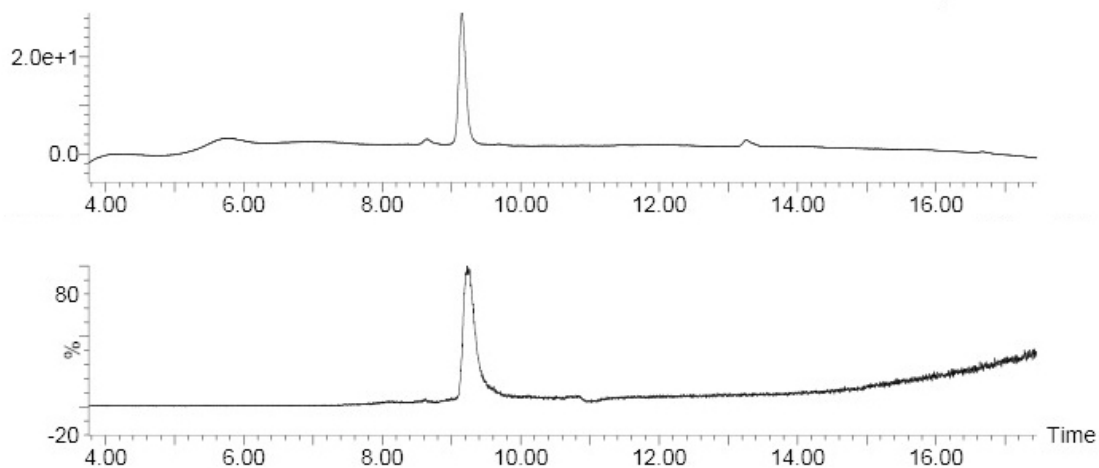

**Spectrum 32.** UV and MS traces from LC-MS analysis of purified compound **14**: gradient 5-95% CH<sub>3</sub>CN/H<sub>2</sub>O over 15 min at a flow rate of 0.6 mL/min.

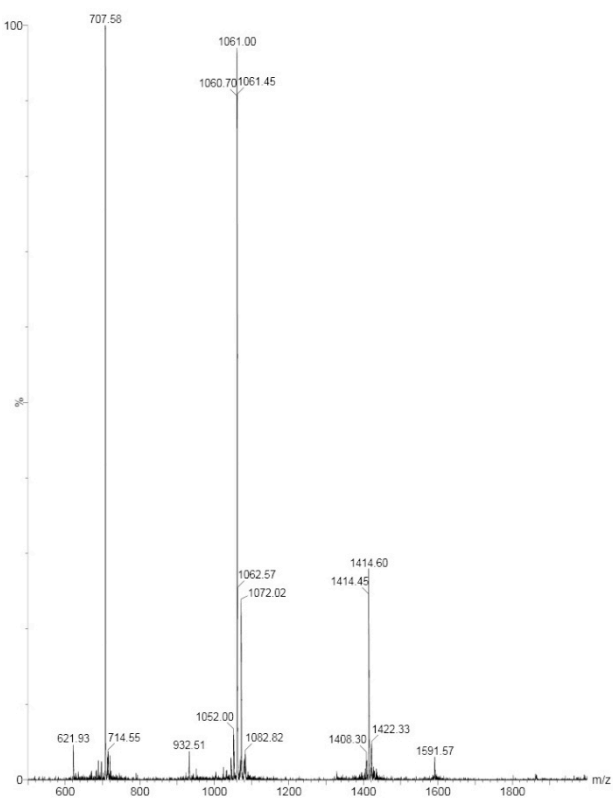

**Spectrum 33.** ESI calcd for C<sub>94</sub>H<sub>142</sub>N<sub>24</sub>O<sub>28</sub>S<sub>2</sub> [M+H]<sup>+</sup>  $m/z = 2121.41$  [M+2H]<sup>2+</sup>  $m/z = 1061.20$  [M+3H]<sup>3+</sup>  $m/z = 707.80$ , found: 1061.00, 707.58.

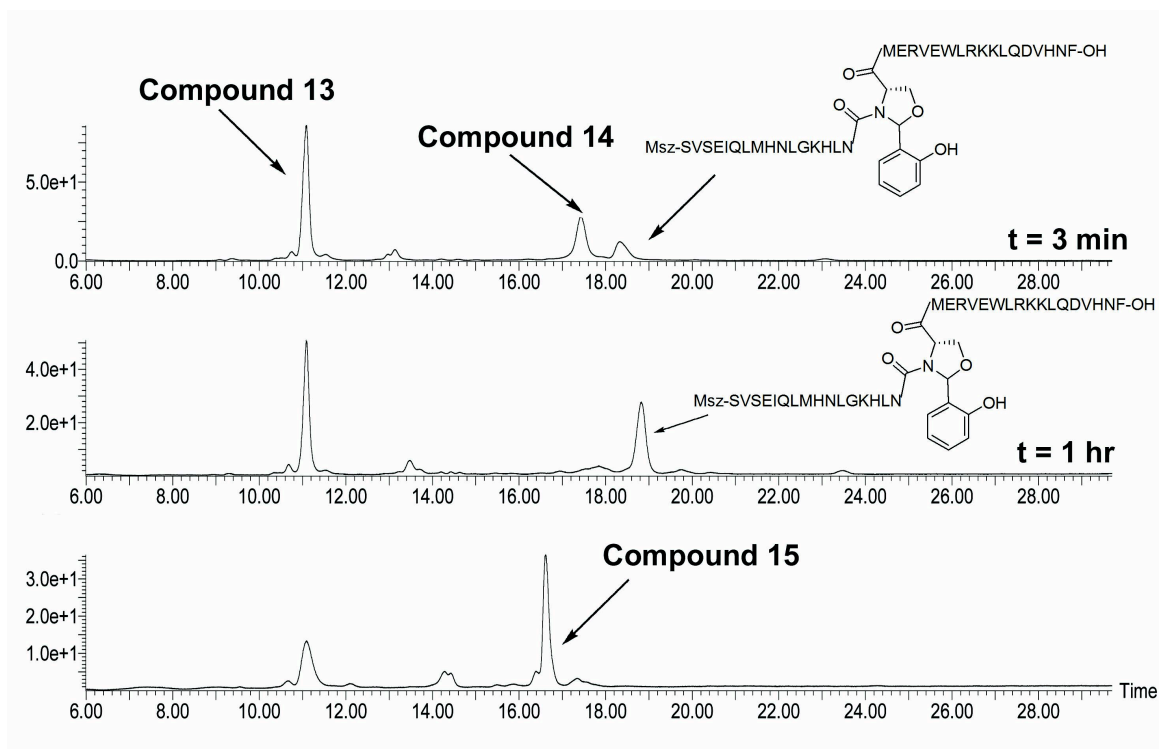

**Spectrum 34.** UV traces from LC-MS analysis of **serine ligation**: gradient 20-45% CH<sub>3</sub>CN/H<sub>2</sub>O over 30 min at a flow rate of 0.6 mL/min.

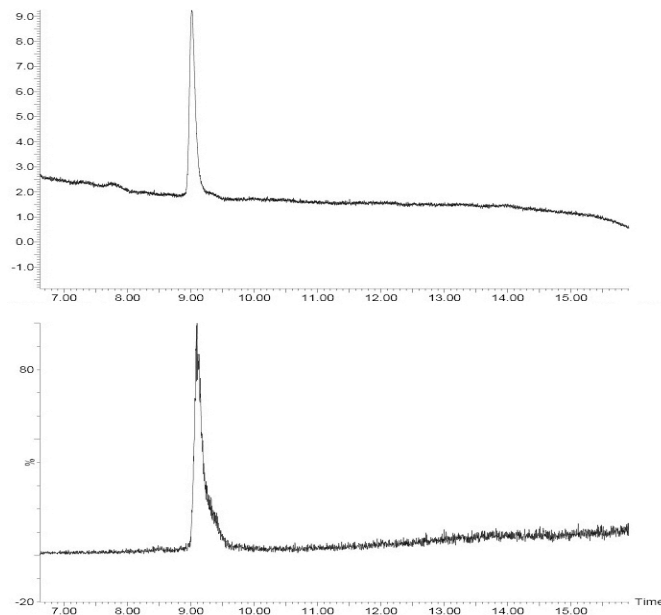

**Spectrum 35.** UV and MS traces from LC-MS analysis of purified compound **15**: gradient 5-95% CH<sub>3</sub>CN/H<sub>2</sub>O over 15 min at a flow rate of 0.6 mL/min.

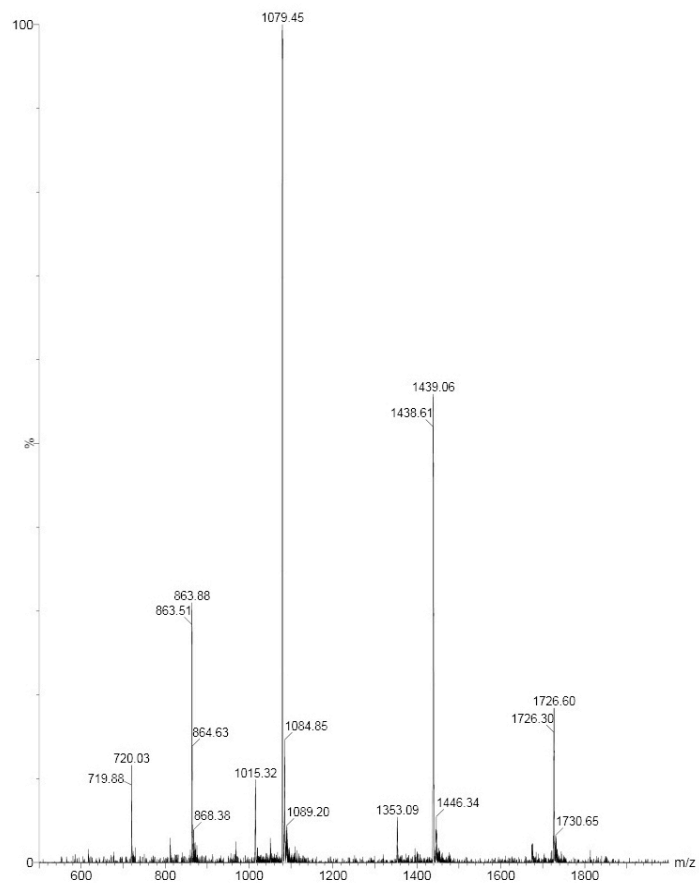

**Spectrum 36.** ESI calcd for  $C_{190}H_{299}N_{55}O_{54}S_3$   $[M+H]^+$   $m/z = 4314.94$   $[M+3H]^{3+}$   $m/z = 1438.98$   $[M+4H]^{4+}$   $m/z = 1079.48$   $[M+5H]^{5+}$   $m/z = 863.79$   $[M+6H]^{6+}$   $m/z = 719.99$ , found: 1439.06, 1079.45, 863.88, 720.03.

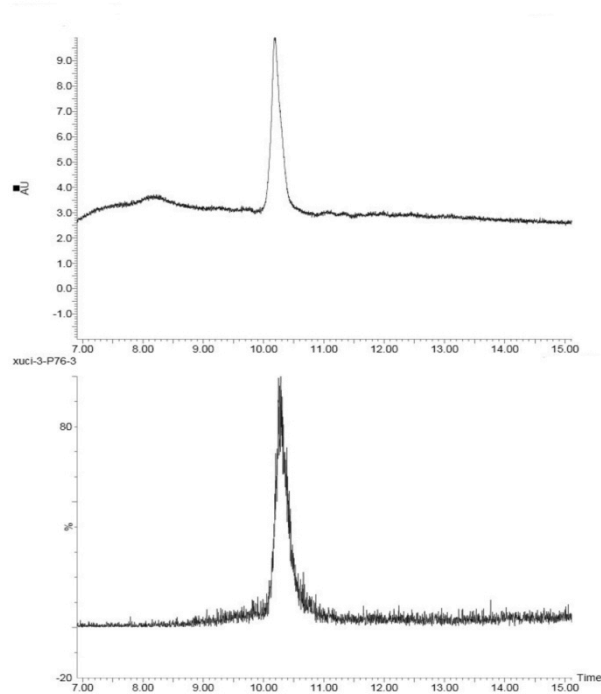

**Spectrum 37.** UV and MS traces from LC-MS analysis of purified compound **16**: gradient 5-95% CH<sub>3</sub>CN/H<sub>2</sub>O over 15 min at a flow rate of 0.6 mL/min.

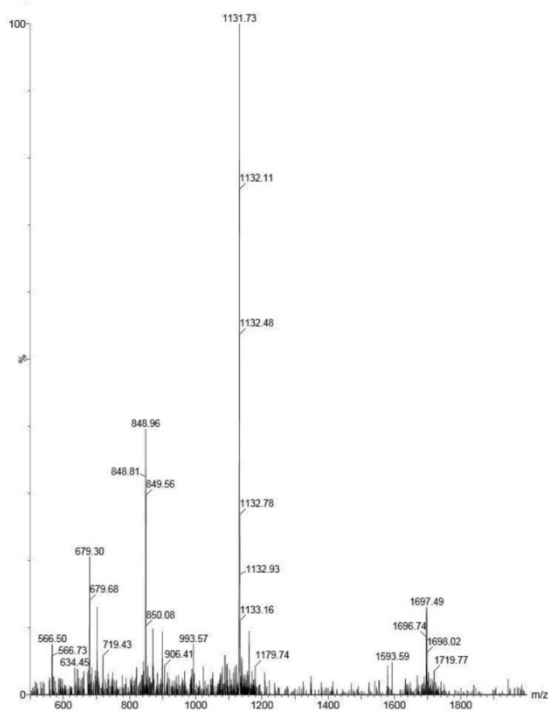

**Spectrum 38.** ESI calcd for C<sub>154</sub>H<sub>244</sub>N<sub>40</sub>O<sub>46</sub> [M+2H]<sup>2+</sup>  $m/z = 1696.92$  [M+3H]<sup>3+</sup>  $m/z = 1131.61$  [M+4H]<sup>4+</sup>  $m/z = 848.96$  [M+5H]<sup>5+</sup>  $m/z = 679.37$ , [M+6H]<sup>6+</sup>  $m/z = 566.30$ , found: 1697.49, 1131.73, 848.96, 679.30, 566.50.

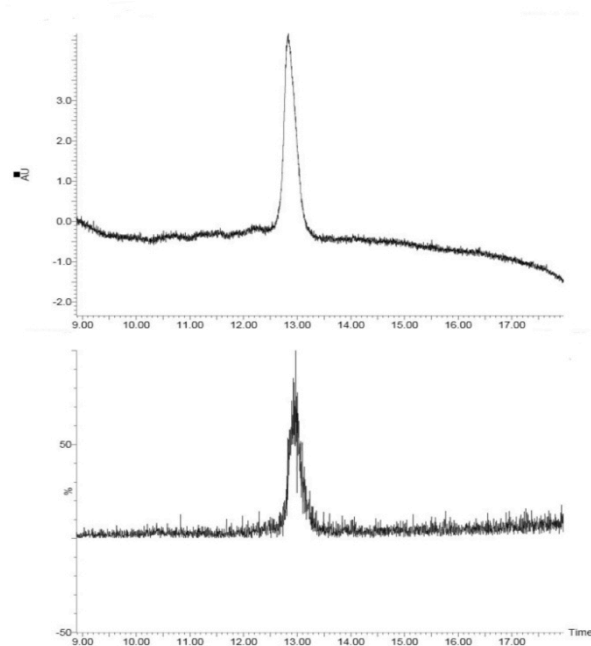

**Spectrum 39.** UV and MS traces from LC-MS analysis of compound **17**: gradient 5-95% CH<sub>3</sub>CN/H<sub>2</sub>O over 15 min at a flow rate of 0.6 mL/min.

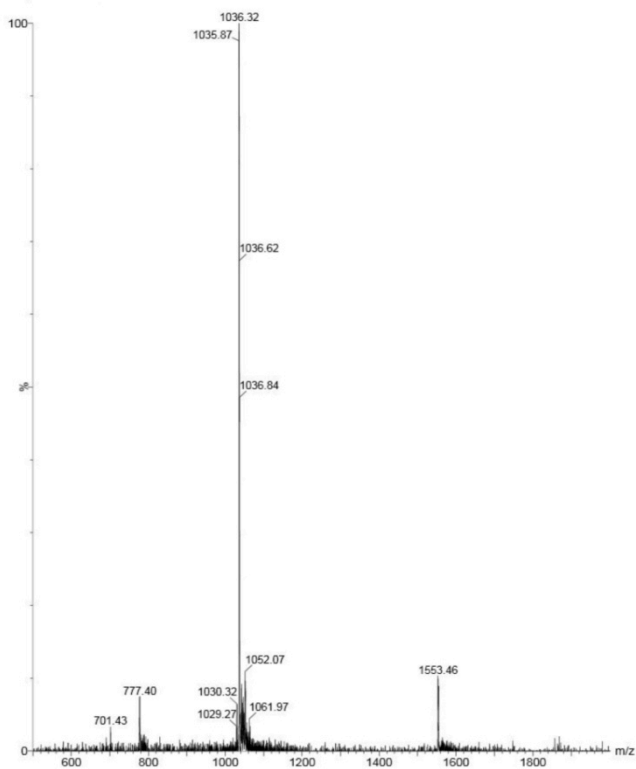

**Spectrum 40.** ESI calcd for C<sub>142</sub>H<sub>210</sub>N<sub>38</sub>O<sub>39</sub>S [M+2H]<sup>2+</sup> m/z = 1553.74 [M+3H]<sup>3+</sup> m/z = 1036.16 [M+4H]<sup>4+</sup> m/z = 777.37, found: 1553.46, 1036.32, 777.40.



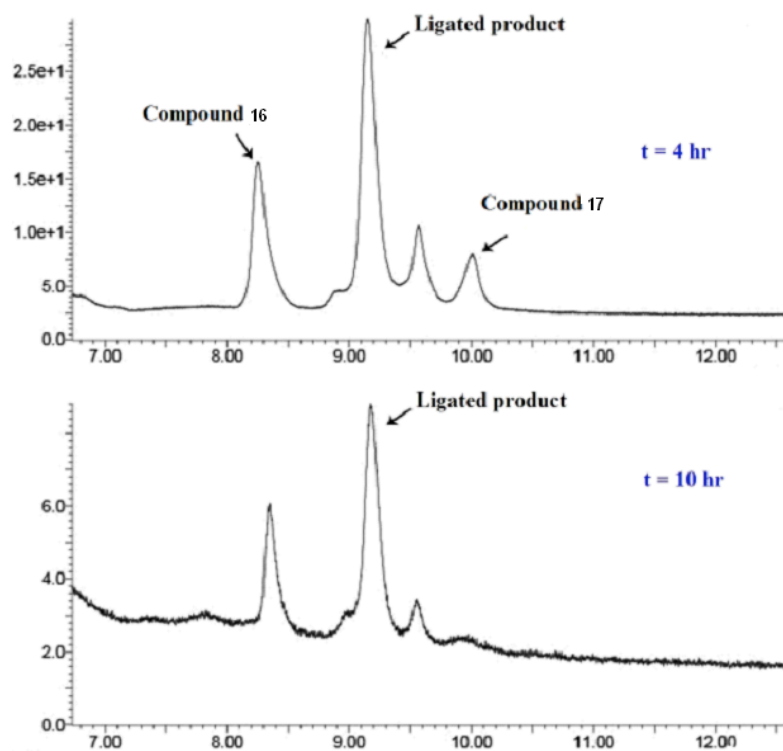

**Spectrum 41.** UV traces from LC-MS analysis of **serine ligation**: gradient 5-95% CH<sub>3</sub>CN/H<sub>2</sub>O over 15 min at a flow rate of 0.6 mL/min.

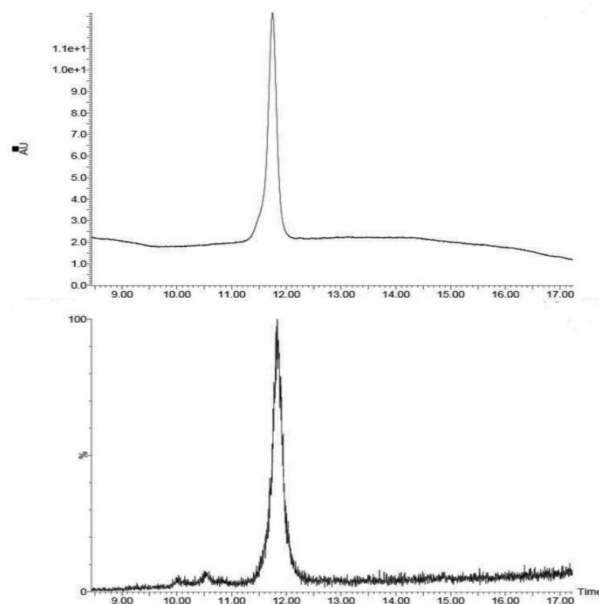

**Spectrum 42.** UV and MS traces from LC-MS analysis of purified compound **18**: gradient 5-95% CH<sub>3</sub>CN/H<sub>2</sub>O over 15 min at a flow rate of 0.6 mL/min.

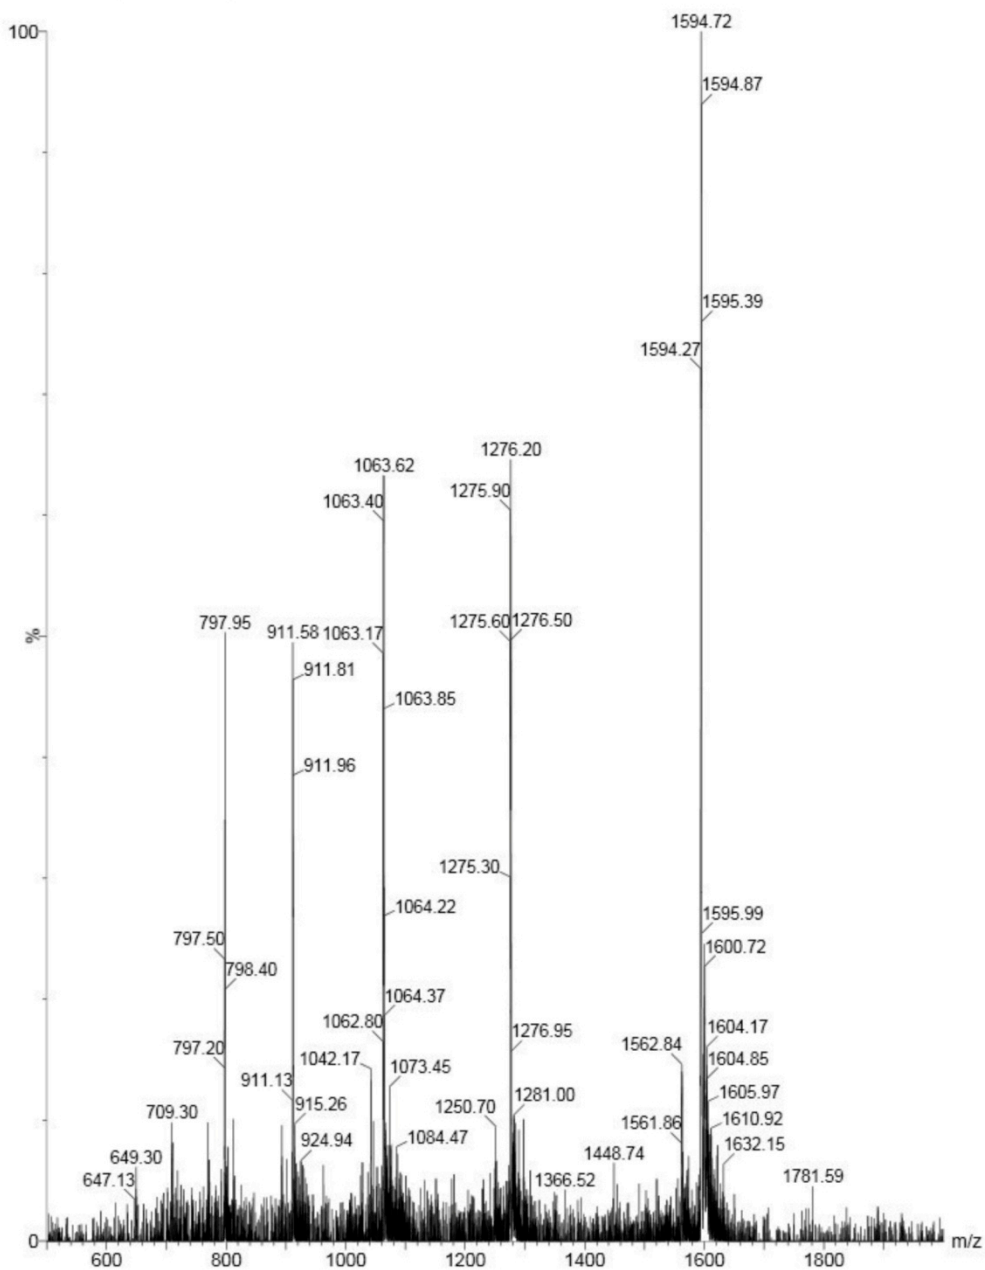

**Spectrum 43.** ESI calcd for  $C_{289}H_{448}N_{78}O_{83}S$   $[M+4H]^{4+}$   $m/z = 1594.80$   $[M+5H]^{5+}$   $m/z = 1276.04$   $[M+6H]^{6+}$   $m/z = 1063.53$   $[M+7H]^{7+}$   $m/z = 911.74$   $[M+8H]^{8+}$   $m/z = 797.90$   $[M+9H]^{9+}$   $m/z = 709.35$  found: 1594.72, 1276.20, 1063.62, 911.58, 797.95, 709.35.

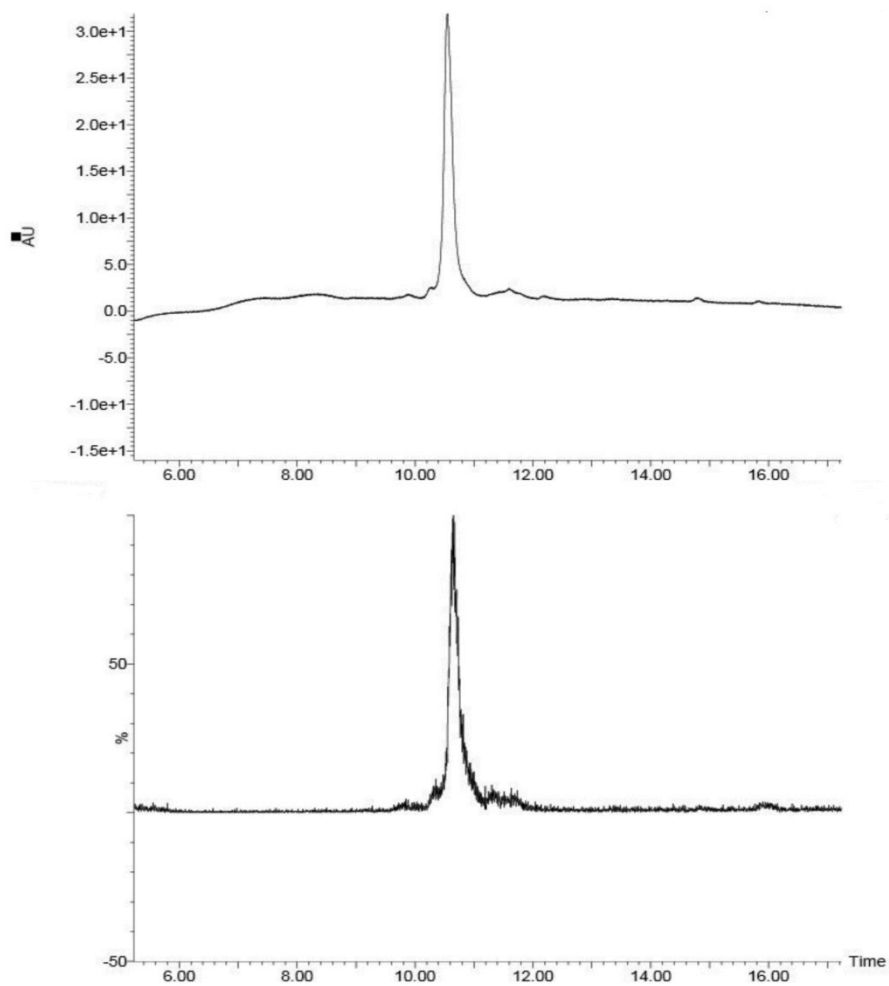

**Spectrum 44.** UV and MS traces from LC-MS analysis of compound **19**: gradient 5-95% CH<sub>3</sub>CN/H<sub>2</sub>O over 15 min at a flow rate of 0.6 mL/min.

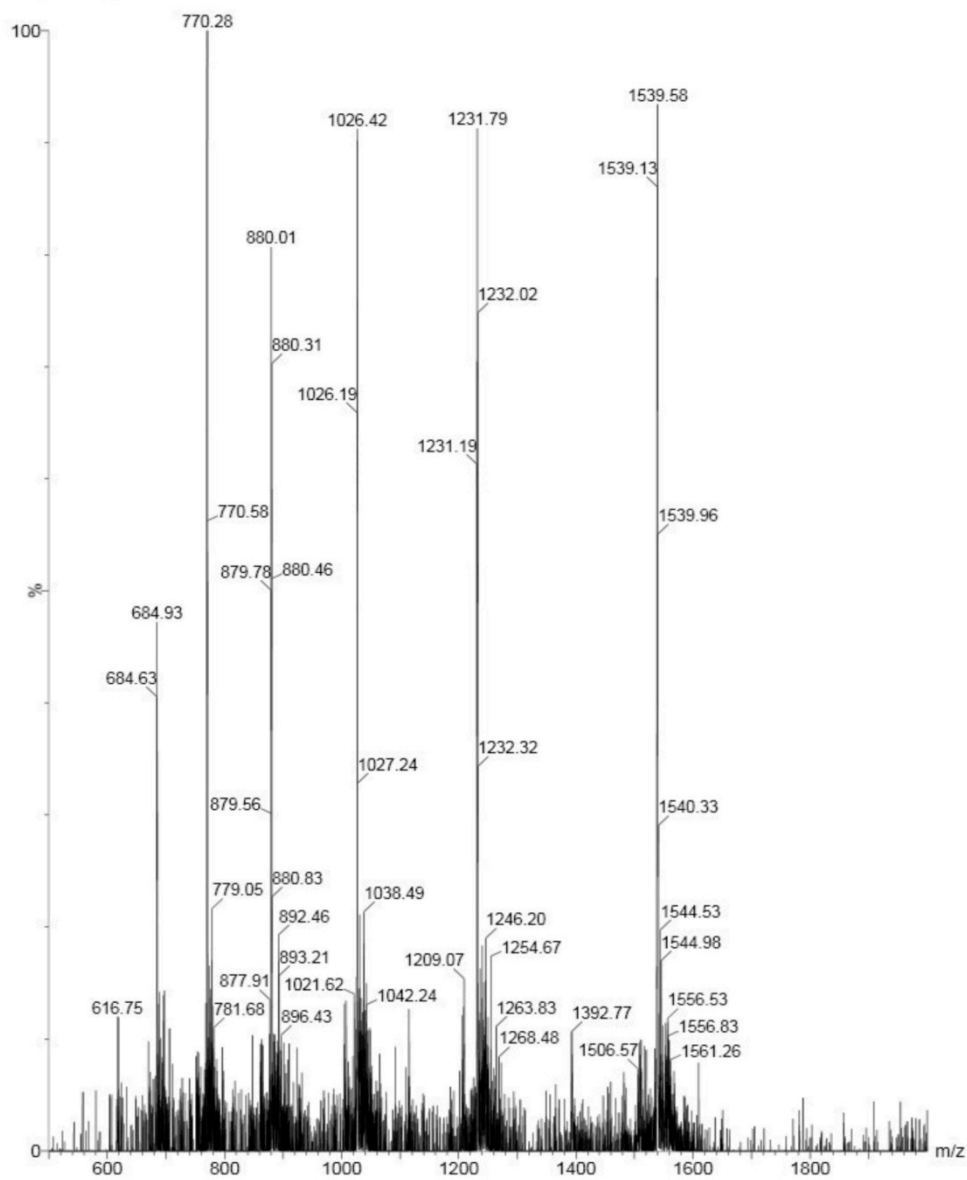

**Spectrum 45.** ESI calcd for  $C_{274}H_{438}N_{78}O_{81}S$   $[M+4H]^{4+}$   $m/z = 1539.24$   $[M+5H]^{5+}$   $m/z = 1231.59$   $[M+6H]^{6+}$   $m/z = 1026.49$   $[M+7H]^{7+}$   $m/z = 879.99$   $[M+8H]^{8+}$   $m/z = 770.12$   $[M+9H]^{9+}$   $m/z = 684.66$   $[M+10H]^{10+}$   $m/z = 616.30$ , found: 1539.58, 1231.79, 1026.42, 880.01, 770.28, 684.93, 616.75.

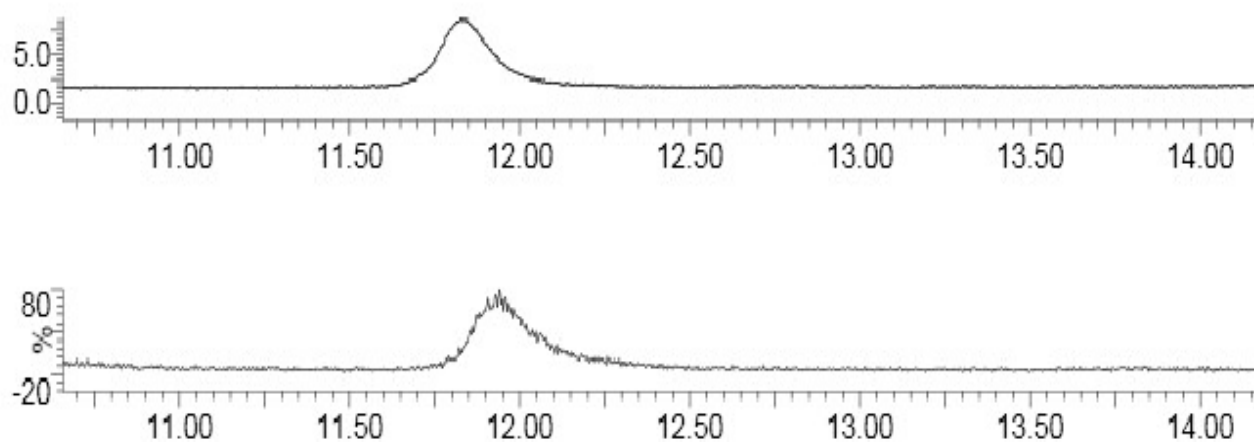

**Spectrum 46.** UV and MS traces from LC-MS analysis of purified compound **20**: gradient 5-95% CH<sub>3</sub>CN/H<sub>2</sub>O over 15 min at a flow rate of 0.6 mL/min.

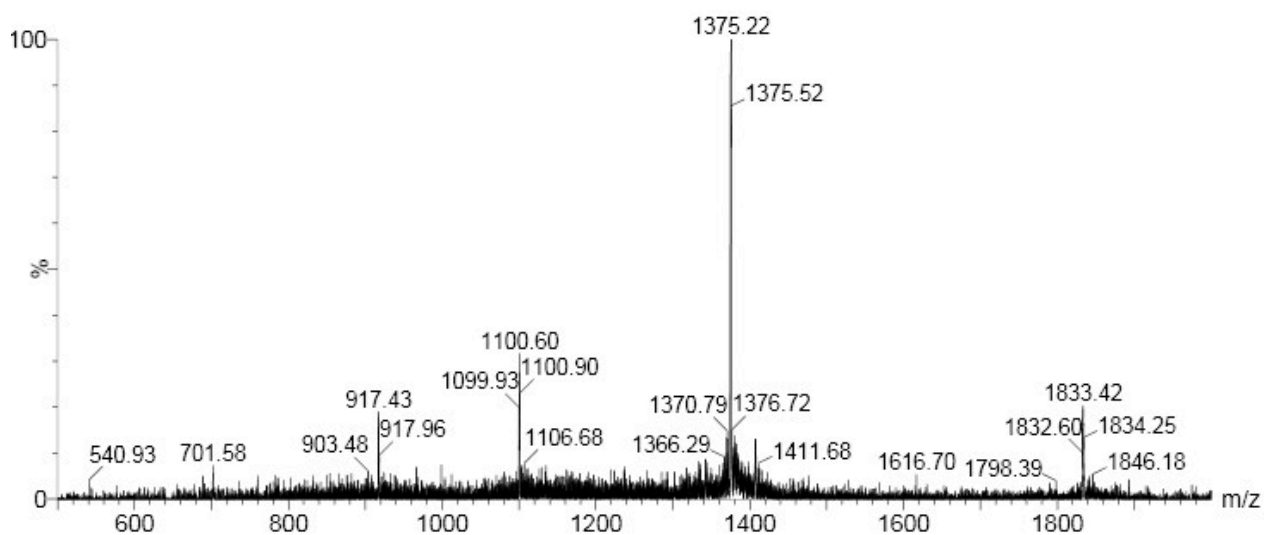

**Spectrum 47.** ESI calcd for C<sub>253</sub>H<sub>375</sub>N<sub>63</sub>O<sub>75</sub> [M+3H]<sup>3+</sup> m/z = 1834.02 [M+4H]<sup>4+</sup> m/z = 1375.77 [M+5H]<sup>5+</sup> m/z = 1100.81 [M+6H]<sup>6+</sup> m/z = 917.51, found: 1833.42, 1375.22, 1100.60, 917.43.

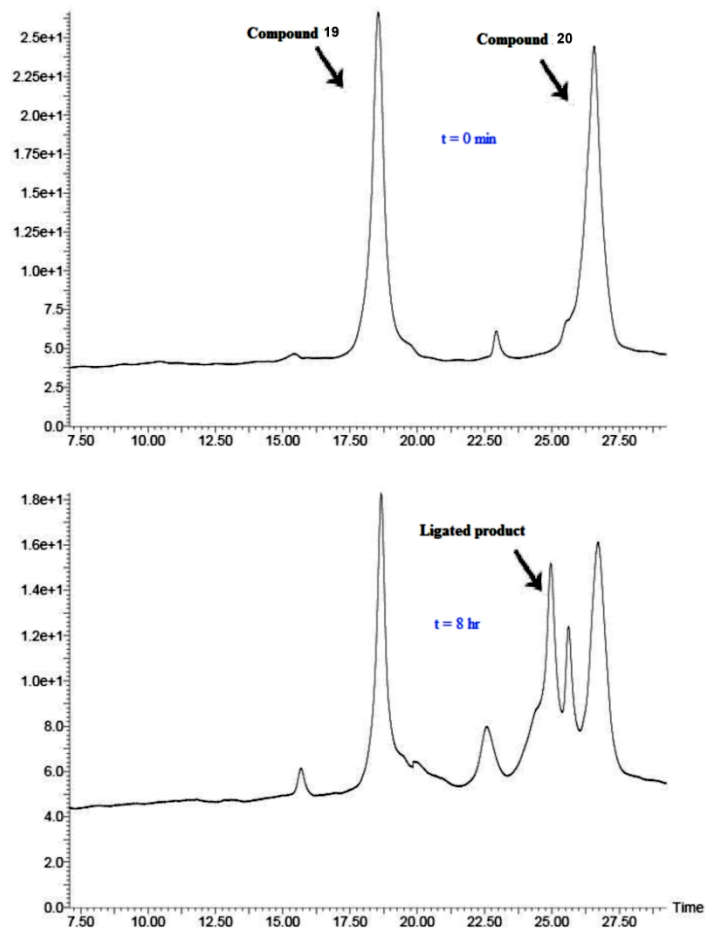

**Spectrum 48.** UV traces from LC-MS analysis of **threonine ligation**: gradient 20-45%  $\text{CH}_3\text{CN}/\text{H}_2\text{O}$  over 30min and at a flow rate of 0.6 mL/min.

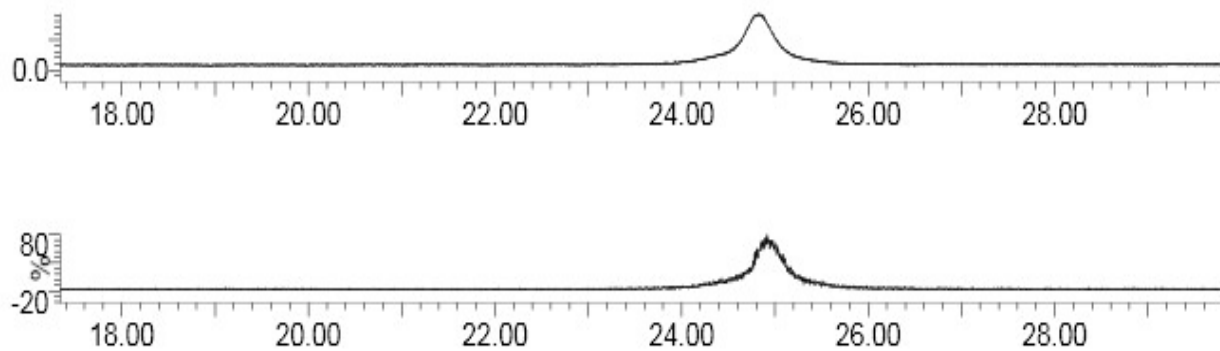

**Spectrum 49.** UV and MS traces from LC-MS analysis of purified compound **21**: gradient 20-45% CH<sub>3</sub>CN/H<sub>2</sub>O over 15 min at a flow rate of 0.6 mL/min.

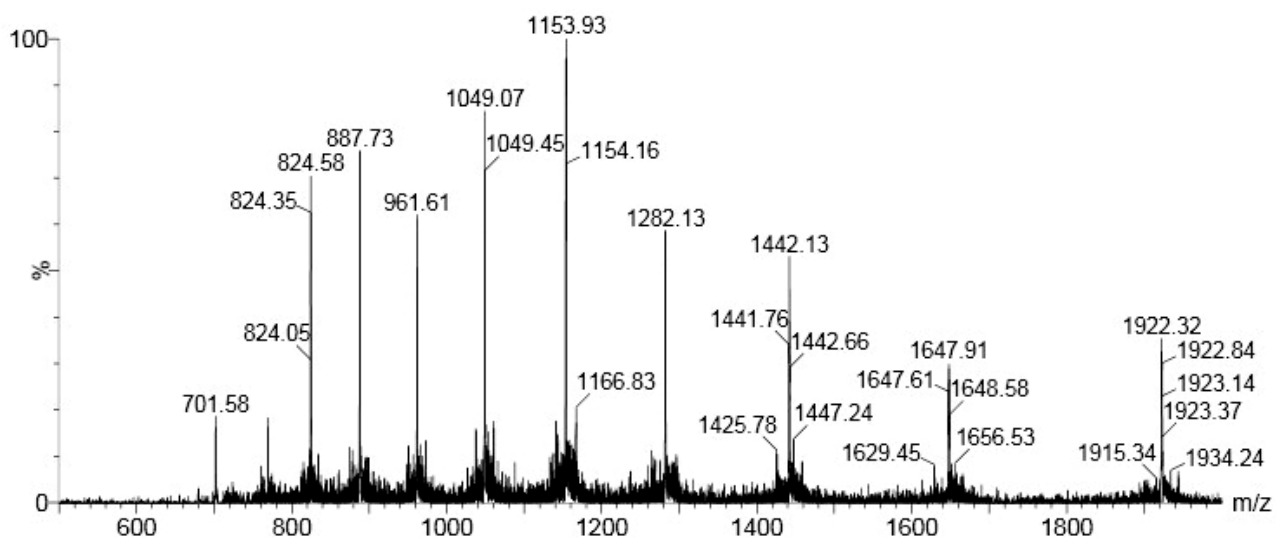

**Spectrum 50.** ESI calcd for C<sub>520</sub>H<sub>807</sub>N<sub>141</sub>O<sub>154</sub>S [M+6H]<sup>6+</sup>  $m/z = 1922.65$  [M+7H]<sup>7+</sup>  $m/z = 1648.13$  [M+8H]<sup>8+</sup>  $m/z = 1442.24$  [M+9H]<sup>9+</sup>  $m/z = 1282.10$  [M+10H]<sup>10+</sup>  $m/z = 1153.99$  [M+11H]<sup>11+</sup>  $m/z = 1049.17$  [M+12H]<sup>12+</sup>  $m/z = 961.82$  [M+13H]<sup>13+</sup>  $m/z = 887.91$ , [M+14H]<sup>14+</sup>  $m/z = 824.56$ , found: 1922.32, 1647.91, 1442.13, 1282.13, 1153.93, 1049.07, 961.61, 887.73, 824.58.

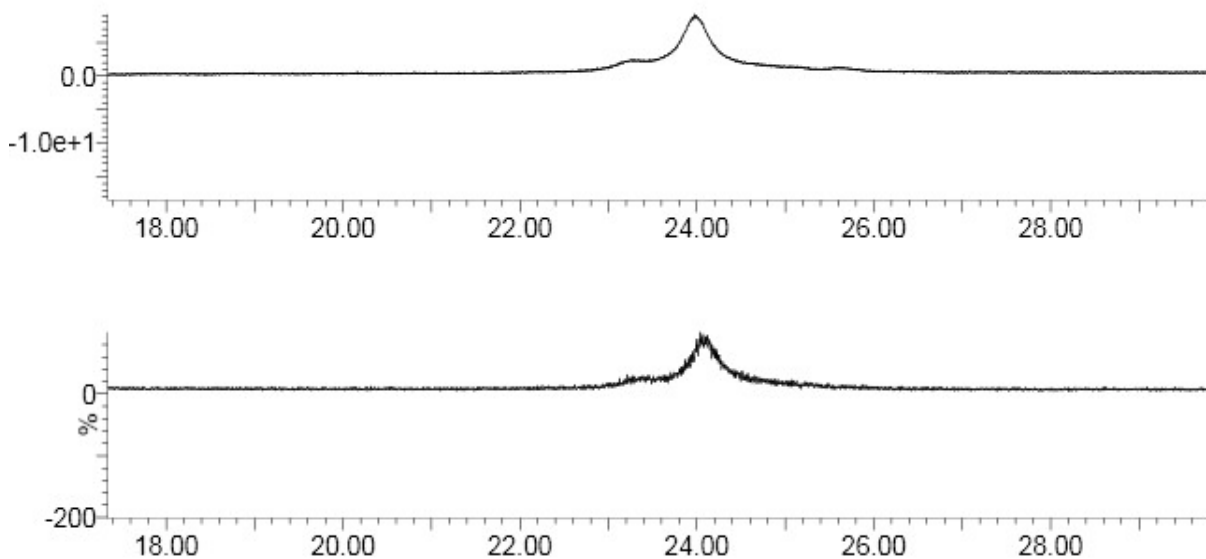

**Spectrum 51.** UV and MS traces from LC-MS analysis of crude compound **22** gradient 20 - 45% CH<sub>3</sub>CN/H<sub>2</sub>O over 30 min at a flow rate of 0.6 mL/min.

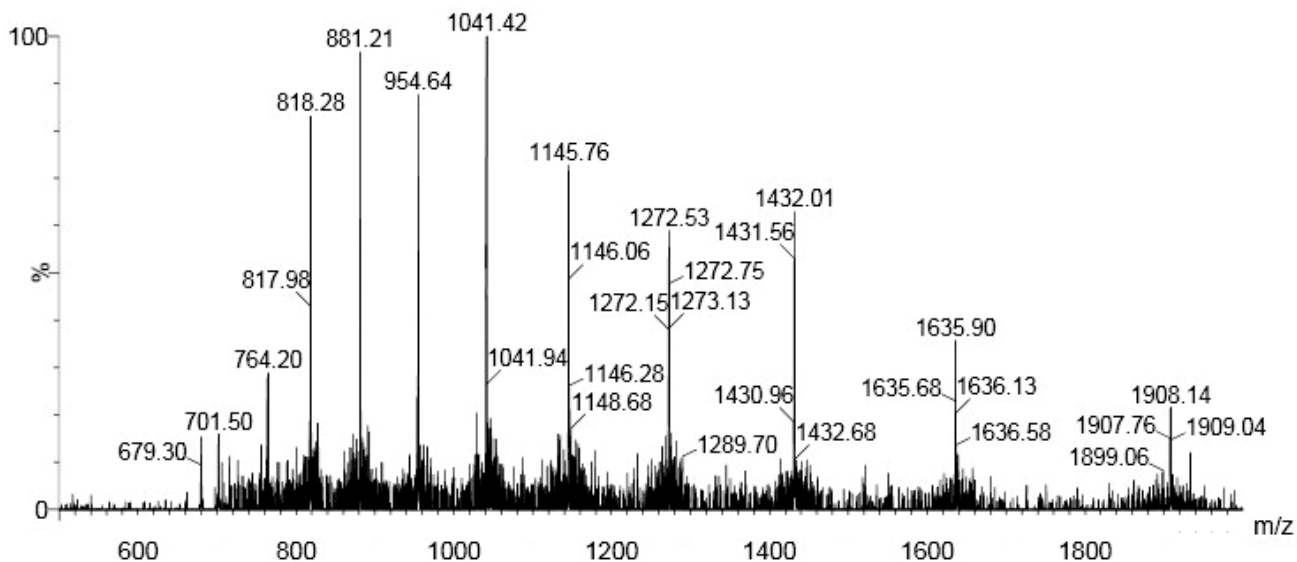

**Spectrum 52.** ESI calcd for C<sub>516</sub>H<sub>803</sub>N<sub>141</sub>O<sub>152</sub>S [M+6H]<sup>6+</sup> m/z = 1908.64 [M+7H]<sup>7+</sup> m/z = 1636.12 [M+8H]<sup>8+</sup> m/z = 1431.73, [M+9H]<sup>9+</sup> m/z = 1272.76 [M+10H]<sup>10+</sup> m/z = 1145.58 [M+11H]<sup>11+</sup> m/z = 1041.53 [M+12H]<sup>12+</sup> m/z = 954.82 [M+13H]<sup>13+</sup> m/z = 881.45 [M+14H]<sup>14+</sup> m/z = 818.56 [M+15H]<sup>15+</sup> m/z = 764.058, found: 1908.14, 1635.90, 1432.01, 1272.53, 1145.76, 1041.42, 954.64, 881.21, 818.28, 764.20.



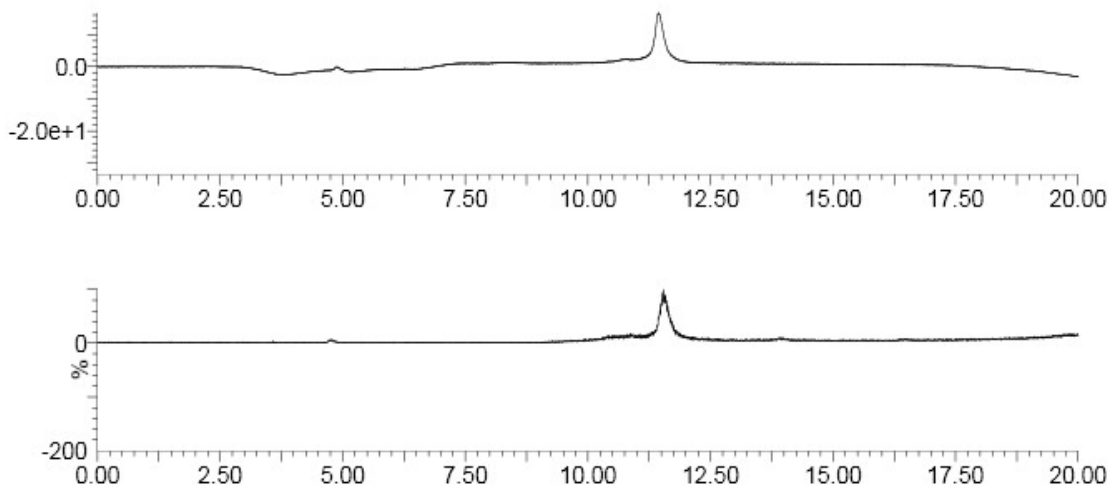

**Spectrum 53.** UV and MS traces from LC-MS analysis of compound **23**: gradient 5-95% CH<sub>3</sub>CN/H<sub>2</sub>O over 15 min at a flow rate of 0.6 mL/min.

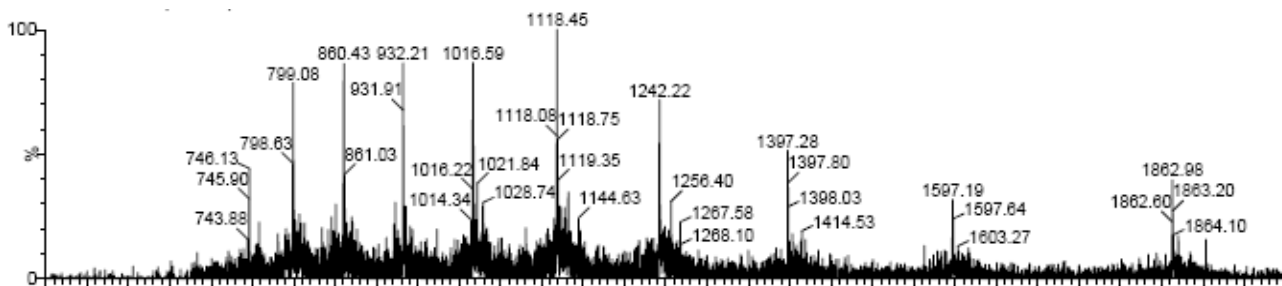

**Spectrum 54.** ESI calcd for C<sub>500</sub>H<sub>787</sub>N<sub>141</sub>O<sub>148</sub>S [M+6H]<sup>6+</sup> m/z = 1863.25 [M+7H]<sup>7+</sup> m/z = 1597.22 [M+8H]<sup>8+</sup> m/z = 1397.69, [M+9H]<sup>9+</sup> m/z = 1242.50 [M+10H]<sup>10+</sup> m/z = 1118.35 [M+11H]<sup>11+</sup> m/z = 1016.77 [M+12H]<sup>12+</sup> m/z = 932.13 [M+13H]<sup>13+</sup> m/z = 860.50 [M+14H]<sup>14+</sup> m/z = 799.11 [M+15H]<sup>15+</sup> m/z = 745.90, found: 1862.98, 1597.19, 1397.28, 1242.22, 1118.45, 1016.59, 932.21, 860.43, 799.08, 746.13.
